# 1 Necroptosis promotes the Aging of the Male Reproductive System in Mice

2

3 Dianrong Li, Lingjun Meng, Tao Xu, Yaning Su, Xiao Liu, Zhiyuan Zhang, Xiaodong Wang\*

4

5 National Institute of Biological Sciences, 7 Science Park Road, Zhongguancun Life Science Park,

6 Beijing 102206, China

7

8 \*For correspondence: wangxiaodong@nibs.ac.cn

9

## 10 **Abstract**

11 Necroptosis is a form of programmed necrotic cell death in mammals that is mediated by a  
12 pair of kinases, RIP1 and RIP3, as well as the RIP3 substrate MLKL. We report here that male  
13 reproductive organs of both RIP3- and MLKL-knockout mice retain “youthful” morphology and  
14 function into advanced age, while those of age-matched wild type mice deteriorate. The RIP3  
15 phosphorylation of MLKL, the activation marker of necroptosis, is detected in spermatogonial  
16 stem cells in the testes of old but not in young wild type mice. When the testes of young wild  
17 type mice are given a local necroptotic stimulus, their reproductive organs showed accelerated  
18 aging. Feeding of wild type mice with an RIP1 inhibitor prior to the normal onset of age-related  
19 changes in their reproductive organs blocked the appearance of signs of aging. Thus, necroptosis  
20 in testes promotes the aging-associated deterioration of the male reproductive system in mice.

21

## 22 **Introduction**

23 Necroptosis is a form of programmed necrotic cell death caused by the tumor necrosis  
24 factor family of cytokines (Christofferson and Yuan, 2010; Vandenabeele et al., 2010). In  
25 response to the activation of TNF receptor family members, receptor-interacting kinase 1 (RIP1)  
26 is recruited to the cytosolic side of the receptor and its kinase activity is activated (Holler et al.,  
27 2000). RIP1 then interacts with and phosphorylates a related kinase, RIP3, leading to its  
28 activation (Cho et al., 2009; Degterev et al., 2008; He et al., 2009; Zhang et al., 2009). If the cells  
29 also happen to have their caspase-8 activity inhibited, either through interaction with its cellular  
30 inhibitor cFLIP or through the action of viral or chemical inhibitors, RIP3 drives the cell fate  
31 towards necroptosis (He et al., 2009; Holler et al., 2000). Necroptosis can be inhibited by RIP1  
32 kinase inhibitor compounds, and can be promoted by small molecule Smac mimetics, which  
33 shifts RIP1 function from NF- $\kappa$ B activation to activation of RIP3 (Degterev et al., 2008; Wang et  
34 al., 2008). Once active, RIP3 then phosphorylates a pseudokinase called mixed lineage kinase  
35 domain-like protein (MLKL) (Sun et al., 2012). MLKL normally exists as an inactive monomer  
36 in the cytosol. Upon RIP3 phosphorylation on serine 357 and threonine 358 of human MLKL or  
37 the mouse equivalent of serine 345, serine 347, and threonine 349, MLKL forms oligomers and  
38 translocates to the plasma membrane, where it disrupts membrane integrity, resulting in necrotic  
39 cell death (Cai et al., 2014; Chen et al., 2014; Rodriguez et al., 2016; Sun et al., 2012; Wang et  
40 al., 2014).

41 Necroptosis is known to have important functions under pathological conditions of  
42 microbial infections or tissue damage since RIP3 knockout mice show defects in defending  
43 microbial infections or manifest less tissue damage in a variety of chemical or ischemic  
44 reperfusion induced tissue damage models (Cho et al., 2009; He et al., 2009; Robinson et al.,

45 2012; Upton et al., 2010; Zhou and Yuan, 2014). However, mice with RIP3 or MLKL gene  
46 knockout are remarkably normal without any noticeable developmental, physiological, or  
47 fertility defects (Murphy et al., 2013; Newton et al., 2004; Wu et al., 2013). Therefore, under  
48 what physiological conditions necroptosis happens in which tissue remains the biggest  
49 unanswered question in this research field.

50 While conducting a study investigating the impact of necroptosis on the progression of  
51 atherosclerosis (Meng et al., 2015), we serendipitously found that the male reproductive organ of  
52 mice with RIP3 and MLKL knockout looked remarkably young even at advanced ages. A  
53 comprehensive follow up study present here revealed that necroptosis functions in promoting the  
54 aging of male reproductive system in mice.

55

## 56 **Results**

### 57 **The aging of reproductive organs is delayed in RIP3-knockout mice**

58 We first noticed that the 18-month old RIP3-knockout (RIP3<sup>-/-</sup>) mice of the C57BL/6 strain  
59 looked thinner than the age-matched wild type (WT, RIP3<sup>+/+</sup>) mice of the same strain that were  
60 housed under the same conditions (Figure 1A). The average weight of 18-month old wild type  
61 mice was 46 grams, significantly more than of 37 grams of weight of the age-matched RIP3-  
62 knockout mice (Figure 1B). The weights of 4-month old wild type and RIP3-knockout mice, on  
63 the other hand, were indistinguishable (Figure 1B). In addition to differences in whole body  
64 weights, the seminal vesicles, an auxiliary gland in the mouse male reproductive system,  
65 appeared to be quite different between 18-month old RIP3-knockout and wild type mice (Figure  
66 1C). The weights of the seminal vesicles from 18-month old wild type mice (n=33) ranged from

67 ~1,000 mg to 4,500 mg, while the weights of the same organ from the age-matched RIP3-  
68 knockout mice (n=30) were mostly below 1,000 mg (Figure 1D).

69 It is known that seminal vesicles become enlarged as mice get old (Finch and Girgis, 1974;  
70 Pettan-Brewer and Treuting, 2011). The difference in seminal vesicles from wild type and RIP3-  
71 knockout mice become noticeable after one year of life, and become increasingly evident over  
72 time. The seminal vesicles from wild type mice continue to grow, whereas the seminal vesicles  
73 from the RIP3-knockout mice did not change in size from 4 months to 24 months (Figure 1-  
74 figure supplement 1A, 1B). There were no obvious differences in the overall anatomical  
75 structure of seminal vesicles between wild type and RIP3-knockout mice (Figure 1C and Figure  
76 1-figure supplement 1A). Close examination revealed that the epithelium of the seminal vesicles  
77 from 18-month old wild type mice showed irregularities, with spaces separating the epithelium  
78 and the liquid compartment, whereas the seminal-vesicle epithelial cells from the age-matched  
79 RIP3-knockout mice were tightly packed, just as they are in young mice (Figure 1-figure  
80 supplement 1C)

81 The seminal vesicles of mice are anatomically simple, consisting of only an epithelial layer  
82 that envelopes a liquid compartment (Gonzales, 2001). Therefore, the difference in seminal  
83 vesicles between wild type and RIP3-knockout mice did not offer much mechanistic insight what  
84 caused such a phenotype. We further studied the testes of wild type and RIP3-knockout mice. By  
85 the time mice reached 18 months of age, the wild type testes started to appear atrophic, and  
86 weighed less than RIP3-knockout testes (Figure 1-figure supplement 1D, 1E). Consistently, the  
87 testosterone level showed a dramatic drop as wild type mice aged from 4 to 18 months, whereas  
88 the testosterone levels hardly decreased at all in RIP3-knockout mice over the same period  
89 (Figure 1E). Moreover, the typical age-related increase in sex hormone-binding globulin (SHBG)

90 (Vermeulen et al., 1996) that is known to occur in wild type mice was not observed in RIP3-  
91 knockout mice (Figure 1-figure supplement 2A). Interestingly, the levels of two endocrine  
92 factors secreted by the pituitary gland, LH and FSH (Cooke and Saunders, 2002), did not differ  
93 between wild type and RIP3-knockout mice; both dropped significantly as mice aged from 4  
94 months to 18 months (Figure 1-figure supplement 2B, 2C). This finding indicated that the  
95 difference in aging of reproductive system between old wild type and RIP3-knockout mice may  
96 result from local changes in testis.

97 Unlike what often happens in human upon reproductive organ aging, we did not notice any  
98 apparent anatomical difference in the anterior, dorsal, ventral, or lateral prostate by an  
99 hematoxylin and eosin (H&E) staining of mouse prostates (Pettan-Brewer and Treuting, 2011)  
100 sections of young (4-month) or old (18-month) mice of either the wild type or RIP3-knockout  
101 genotypes (Figure 1-figure supplement 3).

102

### 103 **Knockout of RIP3 prevents the depletion of cells in the seminiferous tubules in aged testes**

104 As a male mouse becomes sexually mature, the central lumens of seminiferous tubules in its  
105 testes begin to fill with sperm generated from the surrounding spermatogonial stem cells. The  
106 spermatogonial stem cells and spermatocytes are supported by Sertoli cells, which provide  
107 trophic factors and structural support for spermatogenesis (Cooke and Saunders, 2002). Sperm  
108 are then transferred and stored in the epididymis, from where mature sperm are ejected. After  
109 mixing with fluids from the seminal vesicles and prostate, the sperm travel along the ejaculation  
110 track, where semen is formed (Cooke and Saunders, 2002).

111 When testes from 4-month old and 18-month old wild type and RIP3-knockout mice were  
112 dissected and their cross sections were examined under a microscope, cells in many of the

113 seminiferous tubules from the 18-month old wild type mice were lost, given the seminiferous  
114 tubules an “empty” appearance (Figure 1F, 1G). In contrast, the central lumens of the  
115 seminiferous tubules of 4-month old wild type and RIP3-knockout mice are fully surrounded  
116 with cells, and are filled with sperm. Strikingly, the seminiferous tubules of 18-month old RIP3-  
117 knockout mice looked no different than those of 4-month old mice (Figure 1F, 1G). Even more  
118 dramatically, when testis sections from 36-month old mice were examined, close to half of  
119 seminiferous tubules of wild type mice were empty, while more than 90% of those from the  
120 RIP3-knockout mice still appeared normal (Figure 1-figure supplement 4).

121 Sperm from the seminiferous tubules travel to the epididymis, where they mature and are  
122 stored prior to ejaculation (Cooke and Saunders, 2002). Similar to the phenotypes observed in  
123 the seminiferous tubules, most of the epididymides from 18-month old wild type mice had few  
124 sperm, whereas most of the epididymides of age-matched RIP3-knockout mice were full of  
125 sperm (Figure 1-figure supplement 5A). The sperm counts in epididymes increased steadily  
126 during development and peaked at four months of age, and there was little difference in the  
127 sperm counts between wild type and RIP3-knockout mice up to this time (Figure 1-figure  
128 supplement 5B). The sperm counts of wild type mice then started to decline, while those of  
129 RIP3-knockout mice remained steady until 12 months of age. Even at 24 months, the sperm  
130 counts of RIP3-knockout mice were still comparable with those of 4-month old wild type mice  
131 (Figure 1-figure supplement 5B).

132

### 133 **Knockout of RIP3 prevents age-associated decline of reproductive capacity**

134 To test if the sperm from aged RIP3-knockout mice remain functional, we set up  
135 breeding experiments that mated 4-month old, 13-month old, and 18-month old male mice with

136 pairs of 10-week old wild type female mice. As summarized in Figure 1H, both wild type and  
137 RIP3-knockout 4-month old male mice were fully fertile, and both groups sired a similar number  
138 of pups (Figure 1-table supplement 1). However, for 13-month-old mice, only 9 of the 20 wild  
139 type male mice sired pups, while 18 out of 23 RIP3-knockout males remained fertile (Figure 1H  
140 and Figure 1-table supplement 1,2). The difference was even more obvious with the 18-month  
141 old male mice. Only 4 out of 22 wild type male mice were still fertile at this age, whereas 15 out  
142 of 22 RIP3-knockout male mice remained fertile (Figure 1H and Figure 1-table supplement 1).  
143 We subsequently measured the reproductive longevity of wild type and RIP3-knockout male  
144 mice by pairing a pair of 10-weeks old female mice with each male in a cage and switch out a  
145 fresh pair of females every other month (Hofmann et al., 2015). Monitoring of the age at which  
146 each male sired its last litter showed that wild type mice on average lost the ability to sire  
147 offspring around 16 months, while the RIP3-knockout mice did not lose this ability until 22  
148 months (Figure 1I).

149

### 150 **RIP3 expression in spermatogonia, spermatocytes and Sertoli cells in testis**

151 To investigate the underlining mechanism responsible for the delayed reproductive system  
152 aging phenotype, we first examined RIP3 expression using immunohistochemistry methods  
153 (IHC). We noted that the cells inside wild type seminiferous tubules were stained positively with  
154 anti-RIP3 antibody (Figure 2-figure supplement 1). In contrast, no staining was seen in the  
155 seminiferous tubules of RIP3-knockout mice, confirming the specificity of the antibody (Figure  
156 2-figure supplement 1).

157 The specific cell types from testes were further analyzed by co-immunostaining of testis  
158 sections from sexually-mature wild type mice (8-weeks) with antibodies against RIP3 and other

159 previously-described cell-type specific markers. RIP3 expression was apparent in germ line  
160 spermatogonia expressing UTF1 (Jung et al., 2014; van Bragt et al., 2008) and in Sertoli cells  
161 expressing GATA-1 (Tsai et al., 2006). The testosterone-producing Leydig cells (marked by the  
162 HSD3B1 as described in Chang et al., 2011) located outside of seminiferous tubules, however,  
163 did not express RIP3 (Figure 2A). The RIP3 expression in each of these cell types was further  
164 confirmed when testes were dissected and the cells were spread on a slide and analyzed again  
165 with co-immunostaining. The cell shapes changed due to spreading with this method, but the  
166 individual cells were more clearly visible. Consistent with the IHC staining results,  
167 spermatogonia and Sertoli cells were positive for RIP3 staining while Leydig cells were not  
168 (Figure 2B). Moreover, the primary spermatocytes within seminiferous tubules that were not  
169 marked by IHC were now clearly visible when stained with the specific marker SMAD3  
170 (Hentrich et al., 2011), and these cells expressed RIP3 (Figure 2B). The fact that the cells within  
171 seminiferous tubules, the sperm-producing unit of testis, are all positive for RIP3 expression  
172 raised a possibility that the age-associated depletion of these cells is through necroptosis.

173

174 **The RIP3 substrate MLKL is phosphorylated in the seminiferous tubules of aged wild type**  
175 **mice**

176 Recall that RIP3 transduces the necroptosis signal by phosphorylating the serine 345 of  
177 pseudokinase MLKL, we used an antibody against phospho-serine 345 of MLKL to analyze the  
178 testes of young and old mice. Phosphorylated MLKL (phospho-MLKL) was detected in  
179 seminiferous tubules in cells surrounding the center lumens in testes of 18-month old wild type  
180 mice, whereas no phospho-MLKL was detected in the same tissue area of 8-week old wild type  
181 mice, nor in 18-month old RIP3-knockout mice (Figure 2C). A quantitative analysis of the



182 phospho-MLKL staining of each age and genotype group is shown in Figure 2D. The data  
183 clearly showed that necroptosis-activation marker, i.e. serine-345 phosphorylation, was present  
184 abundantly in the seminiferous tubules of old wild type mice but not in young and RIP3-  
185 knockout mice, thus suggesting that necroptosis of these RIP3-expressing cells in seminiferous  
186 tubules might trigger the aging of male sex organs. Consistently, phospho-MLKL was detected  
187 by western blotting in extracts from testes of 18- and 24-month old wild type mice but not in  
188 extracts from age-matched RIP3 knockout mice (Figure 2E).

189 To further identify the exact cell type in the aged seminiferous tubules that show positive  
190 marker of necroptosis, we co-stained the testis sections with antibodies that specifically mark the  
191 different cell types in seminiferous tubules. As shown in Figure 2F, spermatogonia that  
192 specifically expressing UTF1 were co-stained with the anti-phospho-MLKL antibody. On the  
193 other hand, Sertoli cells did not show phosphor-MLKL staining even though they do express  
194 RIP3. Not surprisingly, Leydig cells that do not have RIP3 expression also did not stain with the  
195 phosphor-MLKL antibody.

196

### 197 **Activation of apoptosis in Leydig cells during aging**

198 The sex hormone-producing Leydig cells in testes do not express RIP3, yet in old mice  
199 testis, the hormone level drops and Leydig cells are also gone. We therefore checked the  
200 cleavage status of procaspase-3 (a known marker of apoptosis) and procaspase-8 in the aged  
201 testes of wild type and RIP3-knockout mice using IHC. Cleaved procaspase-3 and Cleaved  
202 procaspase-8 was detected in the wild type Leydig cells of 18, and 36-month old mice, while no  
203 such signal was observed in age-matched RIP3-knockout mice (Figure 3A-3D and Figure3-  
204 figure supplement 1A,1B). The cleaved-Caspase-3 was also detected by western blotting using

205 extracts from the aged wild type testes but not in RIP3-knockout testes (Figure 3-figure  
206 supplement 1C). It is thus likely that Leydig cells undergo apoptosis, as a secondary response to  
207 necroptosis in seminiferous tubules during aging process.

208

### 209 **Caspase-8 levels decrease during aging in empty seminiferous tubules**

210 We also used immunohistochemistry methods to examine the caspase-8 level in relative  
211 to RIP3 in testes of wild type mice of advanced age. In aged wild type mice, caspase-8 levels  
212 decreased in the seminiferous tubules showing the sign of cell depletion (Figure 3E, 3F), and  
213 increased in the Leydig cells (Figure3-figure supplement 2). This reduction in caspase-8 may  
214 explain how it is that necroptosis, but not apoptosis, occurs in the seminiferous tubules of aged  
215 mice.

216

### 217 **Knockout of MLKL also delays the aging of mouse reproductive organs**

218 The delayed testis aging phenotype of RIP3 knockout mice and detection of necroptosis  
219 activation marker in spermatogonia in aged wild type mice suggest that necroptosis might be the  
220 underlying cause of testis aging. To further investigate possibility, we also characterized the  
221 aging-associated phenotype of MLKL knockout mice. We first weighed 15-month old wild type,  
222 RIP3-knockout, and MLKL-knockout (MLKL<sup>-/-</sup>) mice. There was no significant difference  
223 between the weights of MLKL- and RIP3-knockout mice, and mice of both of these knockout  
224 genotypes weighed less than wild type mice at this age (Figure 4A). We also analyzed seminal  
225 vesicles and seminiferous tubules in aged MLKL-knockout mice (15-month old). Compared to  
226 the obvious aging that had occurred in wild type mice, the seminal vesicles of MLKL-knockout  
227 mice maintained a youthful appearance, exhibiting the same phenotype as RIP3-knockout mice

228 (Figure 4B). Furthermore, while the majority of seminal vesicles from 15-month old wild type  
229 mice weighed more than 1,000 milligrams, almost all of the seminal vesicles from age-matched  
230 MLKL- and RIP3-knockout weighed less than 1,000 milligrams (Figure 4C). Consistently, the  
231 testosterone levels of both MLKL- and RIP3-knockout mice were also significant higher than  
232 those of age-matched wild type mice (Figure 4D). Further, very few (<2%) of the seminiferous  
233 tubules from MLKL-knockout mice were empty at 15 months of age, similar to the tubules of  
234 RIP3-knockout mice, while more than 12% of seminiferous tubules from the age-matched wild  
235 type mice were already empty (Figure 4E, 4F). Finally, the fertility rates of both 16-Month old  
236 MLKL- and RIP3-knockout mice were also significant higher than those of age-matched wild  
237 type mice (Figure 4G).

238

### 239 **Induction of necroptosis in testis depleted cells in seminiferous tubules**

240 To directly demonstrate that necroptosis in testes is sufficient to cause the aging of the  
241 male reproductive system, we injected a combination of TNF- $\alpha$ , Smac mimetic, and caspase  
242 inhibitor z-VAD-FMK (henceforth 'TSZ')(He et al., 2009), a known necroptosis stimulus to the  
243 testes of 2-month old mice. Injection of TSZ directly into the testis induced MLKL  
244 phosphorylation (Figure 5A, 5B). Phospho-MLKL was obviously present within the  
245 seminiferous tubules of TSZ-injected wild type testes, but not TSZ-treated RIP3-knockout or  
246 MLKL-knockout testes, confirming the activation of necroptosis in testes following TSZ  
247 injection (Figure 5C). Moreover, when the cells were isolated from a wild type testis and then  
248 treated with TSZ prior to staining with antibodies against phospho-MLKL and cell-type specific  
249 markers, cells in the seminiferous tubules, including spermatogonia, Sertoli cells, and  
250 spermatocytes, were stained positive for phospho-MLKL, whereas Leydig cells outside

251 seminiferous tubules were negative (Figure 5-figure supplement 1). The consequences of  
252 necroptosis induction in testes became apparent 72 hours after a single TSZ injection. By this  
253 point, about 25% of wild type seminiferous tubules were empty, whereas almost none of the  
254 seminiferous tubules from RIP3- and MLKL-knockout mice were affected (Figure 5D, 5E).

255

### 256 **Induction of necroptosis in testes accelerates aging of the male reproductive system**

257 In addition to monitoring these short-term effects following TSZ injection of 3-month-old  
258 mice, we waited for three additional months following the injection and assessed the long-term  
259 effects of induced necroptosis in mouse testes. Interestingly, three months after TSZ injection,  
260 the seminal vesicles of wild type recipient mice were as enlarged as those from mice older than  
261 15 months. However, no such enlargement of seminal vesicles was observed in RIP3- and  
262 MLKL-knockout mice after the same TSZ treatment of their testes (Figure 6A, 6B). Additionally,  
263 more than 30% of the wild type seminiferous tubules remained empty three months after the  
264 injection, while those of RIP3- and MLKL- knockout mice appeared completely normal without  
265 any observable loss of cells (Figure 6C, 6D).

266 We also tested the fertility rate of TSZ-treated mice 3-month after the TSZ treatment.  
267 Control injection of saline into the testes of wild type mice did not affect the fertility rate and the  
268 mice remained 100% fertile, but TSZ injection reduced the fertility rate by 87.5% (only 1 of 8  
269 was fertile) (Figure 6E). In contrast, 6 out of 8 RIP3-knockout mice and 7 out of 8 MLKL-  
270 knockout mice were still fertile following TSZ injection (Figure 6E).

271

### 272 **An RIP1 kinase inhibitor blocks aging of the male reproductive system**

273           The identification of the role of necroptosis in the aging of the mouse male reproductive  
274 system suggests the feasibility of a pharmaceutical intervention against the aging process. We  
275 therefore evaluated the effects of a newly-identified, highly-potent, and highly-specific RIP1  
276 kinase inhibitor from our laboratory (henceforth ‘RIPA-56’)(Ren et al., 2017) by incorporating it  
277 into mouse food at 150 mg/kg and 300 mg/kg doses. We first tested the effect of RIPA-56 on  
278 necroptosis in testes by injecting TSZ into testes of 2-month old mice after feeding the mice with  
279 increasing concentrations of RIPA-56-containing chow for one week. RIPA-56 blocked the  
280 appearance of TSZ-induced phospho-MLKL in the testes in a dose-dependent manner, and was  
281 able to completely block necroptosis at the 300 mg/kg dose (Figure 7A, lane 4).

282           We subsequently chose the 300 mg/kg dose to continuously feed 13-month old male wild  
283 type mice for two months to study the long-term effects of blocking necroptosis on testes. After  
284 two months, the mice feed RIPA-56 weighed less than mice fed with control chow diet (Figure  
285 7B). The seminal vesicles of the RIPA-56-treated mice retained the mass (mostly around 1,000  
286 milligrams), while the seminal vesicles from mice on normal chow grew significantly during the  
287 same period, with a majority of them weighing more than 2,000 milligrams (Figure 7C, 7D).  
288 Additionally, the testosterone level of RIPA-56-treated mice remained high, while that of control  
289 mice decreased (Figure 7E). Consistently, more than 12% of the seminiferous tubules of the  
290 control mice were empty, whereas hardly any seminiferous vesicles were empty in the RIPA-56-  
291 treated mice (Figure 7F, 7G). Finally, the fertility rates of the RIPA-56-treated mice were much  
292 higher than those of control mice with 19 out of 25 mice on the RIPA-56 diet were fertile while  
293 only 6 out of 23 mice on normal diet produced progeny (Figure 7H).

294

295 **Discussion**

## 296 **Necroptosis in testis promotes the aging phenotype of mouse male reproductive system**

297 The above presented data indicated that the previously unknown physiological function of  
298 necroptosis is to promote the aging of male reproductive organs. We detected for the first time  
299 under physiological conditions the activation marker of necroptosis in spermatogonia of old  
300 testis. Consistently, mice with either of their core necroptosis execution components RIP3 and  
301 MLKL deleted from their genome showed dramatic delay of male reproductive aging phenotype,  
302 both morphologically and functionally.

303 The delay of aging phenotype seems to be restricted to the reproductive system. We  
304 conducted histological analysis of major organs including small intestines, spleen, lung, liver,  
305 large intestines, kidney, heart, and brain of wild type and RIP3-knockout mice aged 8 weeks, 4  
306 months, 18 months, and 24 months, and observed no differences between wild type and age-  
307 matched RIP3-knockout mice during the aging process (Figure 1-figure supplement 6).

308 The fact that one dose of TSZ treatment applied locally to the testes could mimic the aging  
309 phenotype, including the enlargement of seminal vesicles, the depletion of cells in the  
310 seminiferous tubules, and decreases in fertility rates in wild type but not RIP3-knockout or  
311 MLKL-knockout mice, strongly suggests that necroptosis happening within seminiferous tubules  
312 is the cause of symptomatic male reproductive system aging.

313

## 314 **Necroptosis-promoted male reproductive system aging offers an evolutionary advantage at** 315 **species level**

316 When we examined the progenies sired by the aged RIP3-knockout mice at a time wild type  
317 mice had lost their reproductive activity, we found that they were less healthy than the progenies  
318 sired by young males, with higher rates of prenatal and postnatal death (Figure 1-figure

319 supplement 7A and Figure1-table supplement 1). A study into the possible reason for the  
320 unhealthy offspring revealed accumulated oxidative damage in the sperm DNA of aged RIP3-  
321 knockout mice, measured as the level of 8-hydroxydeoxyguanosine (8-OHdG), a biomarker for  
322 the oxidative damage of DNA (Chigurupati et al., 2008; Johnson et al., 2015; Paul et al., 2011),  
323 was significantly higher in the sperm of 18-month old RIP3-knockout mice than in 4-month old  
324 mice (Figure 1-figure supplement 7B,7C). Also, considering that the levels of the pituitary  
325 hormones LH and FSH declined in RIP3-knockout mice as they age just as they do in wild type  
326 mice, it is obvious that other age-related changes in DNA in their gametes and other organs  
327 occur normally in these mutant mice. Therefore, although mice without the core components of  
328 the necroptosis pathway maintain their reproductive activity into advanced ages (well beyond the  
329 age when wild type mice have largely lost such capacity), these age-associated, non-necroptotic  
330 changes still caused deleterious effects on their progeny.

331 We therefore propose that necroptosis in seminiferous tubules is a physiological response to  
332 yet-to-be-identified, age-related, TNF family of cytokine(s) that transduces necroptosis signal  
333 through the canonical RIP1-RIP3-MLKL pathway. The necroptotic death of cells in seminiferous  
334 tubules of testis then triggers the other downstream age-related phenotypes such as enlargement  
335 of seminal vesicles, decreased testosterone levels and weight gain. Given the large number of  
336 TNF family of cytokines and the signal seems to only act on spermatogonia, the identification of  
337 such a signal is a challenge yet interesting research topic for the future studies.

338 Necroptosis-instigated reproductive system aging effectively eliminates old animals from  
339 the reproductive pool. Given that aged animals carry significantly more DNA damage than  
340 younger animals, their elimination from the mating pool results in healthier pups on the whole,

341 an outcome that would confer an evolutionary advantage over (a population) of animals that do  
342 not thusly employ a necroptosis program in their testes.

343 Interestingly, when wild type mice were fed with food containing an RIP1 inhibitor prior to  
344 the onset of reproductive system aging (13 months), the aging of the male reproductive system  
345 could be completely blocked. This finding not only further confirms that necroptosis is the  
346 mechanism underlying male reproductive system aging, but also demonstrates an apparently-  
347 effective way to delay it.

348

## 349 **Materials and Methods**

### 350 **Mice**

351 The RIP3<sup>-/-</sup> (RIP3-knockout) mice (C57BL/6 strain) were generated as described  
352 previously (He et al., 2009; 2011). The MLKL<sup>-/-</sup> (MLKL-knockout) mice were generated by co-  
353 microinjection of in vitro-translated Cas9 mRNA and gRNA into the C57BL/6 zygotes.  
354 Founders were screened with T7E1 assays and were validated by DNA sequencing. Founders  
355 were intercrossed to generate bi-allelic MLKL<sup>-/-</sup> mice. The gRNA sequence used to generate the  
356 knockout mice was GTAGCAGTTGCAAATTAGCGTGG. C57BL/6 wild type (WT, RIP3<sup>+/+</sup>)  
357 mice were obtained from Vital River Laboratory Co. WT, RIP3<sup>-/-</sup>, and MLKL<sup>-/-</sup> mice were  
358 produced and maintained at the SPF animal facility of the National Institute of Biological  
359 Sciences, Beijing. Animals for the aging study were produced by mating wild type males with  
360 wild type females purchased from Vital River Laboratory Co; RIP3<sup>-/-</sup> mice were produced by  
361 mating RIP3<sup>-/-</sup> males with RIP3<sup>-/-</sup> females; MLKL<sup>-/-</sup> mice were produced by mating MLKL<sup>-/-</sup>  
362 males with MLKL<sup>-/-</sup> females. Animals (male) for the aging study were housed under the same



363 conditions after birth. Animals used for the hormone and the fertility tests were housed  
364 individually in an SPF barrier facility.

### 365 **Antibodies and reagents**

366 The Antibody against RIP3 (#2283; WB, 1:1000; IHC, 1:100) were obtained from  
367 ProSci. Other antibodies used in this study were: anti-GAPDH-HRP (M171-1, MBL, 1:5000),  
368 anti-RIP1 (#3493S, Cell Signaling, 1:2000), anti-MLKL (AO14272B, ABGENT, 1:1000), anti-  
369 Mouse-phospho-MLKL (ab196436; WB, 1:1000; IHC, 1:100), anti-GATA-1 (sc-265, IHC,  
370 1:200), anti-cleaved-caspase-3 (#9661, Cell Signaling; WB, 1:1000; IHC 1:100), anti-caspase-8  
371 (proteintech, 66093-1-Ig, 1:100), anti-cleaved-caspase-8 (8592T, Cell Signaling; IHC 1:100),  
372 anti-HSD3B1 (ab150384, 1:200) (Abcam), anti-SMAD3 (MA5-15663, Thermo, 1:200), 8-OHdG  
373 (N45.1; Genox; 1:200), and anti-UTF1 (#MAB4337, EMD Millipore, 1:200). DPBS (Dulbecco's  
374 Phosphate-Buffered Saline) was purchased from Thermo. Lectin from *Datura stramonium*,  
375 Sodium L-lactate, Deoxyribonuclease I from bovine pancreas, and MEM Non-essential Amino  
376 Acid Solution (100×) were purchased from Sigma. RIPA-56 (RIP1 inhibitor) was generated as  
377 described in Ren et al., 2017.

### 378 **Cell cultures**

379 Primary testis cells were cultured in DMEM:F12 Medium (Hyclone) supplemented with  
380 10% FBS (Invitrogen) and penicillin/streptomycin (Invitrogen).

### 381 **Harvesting of tissues**

382 Mice were euthanized using avertin (20 mg ml<sup>-1</sup>). Animals were euthanized one by one  
383 immediately before dissection, and the dissection was performed as rapidly as possible by a team  
384 of several trained staff members working in concert on a single mouse. Major organs were

385 removed, cut into appropriately-sized pieces, and either flash-frozen in liquid nitrogen and stored  
386 at  $-80^{\circ}\text{C}$  or placed in formalin (Using Bouin's fixative for testis) for preservation. After several  
387 days of formalin fixation at room temperature, tissue fragments were transferred to 70% ethanol  
388 and stored at  $4^{\circ}\text{C}$ . Blood was collected by cardiac puncture, and was allowed to coagulate for the  
389 preparation of serum.

### 390 **Western blotting**

391 Western blotting was performed as previously described (Wang et al., 2014). Briefly, cell  
392 pellet samples were collected and re-suspended in lysis buffer (100 mM Tris-HCl, pH 7.4, 100  
393 mM NaCl, 10% glycerol, 1% Triton X-100, 2 mM EDTA, Roche complete protease inhibitor set,  
394 and Sigma phosphatase inhibitor set), incubated on ice for 30 min, and centrifuged at  $20,000 \times g$   
395 for 30 min. The supernatants were collected for western blotting. Testes tissue samples were  
396 ground and re-suspended in lysis buffer, homogenized for 30 seconds with a Paddle Blender  
397 (Prima, PB100), incubated on ice for 30 min, and centrifuged at  $20,000 \times g$  for 30 min. The  
398 supernatants were collected for western blotting.

### 399 **ELISA**

400 Mice (male) used for the hormone tests were housed individually in an SPF barrier  
401 facility. Mice were sacrificed and blood was clotted for two hours at room temperature before  
402 centrifugation at approximately  $1,000 \times g$  for 20 minutes. Mice blood sera was collected and  
403 assayed immediately or was stored as sample aliquots at  $-20^{\circ}\text{C}$ . The testosterone/FSH/LH levels  
404 were measured with ELISA kits (BIOMATIK, EKU07605, EKU04284, EKU05693); the SHDG  
405 level was measured with an ELISA kit (INSTRUCTION MANUAL, SEA396Mu). The ELISA  
406 assays were performed according to the manufacturer's instructions.

## 407 **Histology, immunohistochemistry, and immunofluorescence**

408 Paraffin-embedded specimens were sectioned to a 5  $\mu$ m thickness and were then  
409 deparaffinized, rehydrated, and stained with haematoxylin and eosin (H&E) using standard  
410 protocols. For preparation of immunohistochemistry samples, sections were dewaxed, incubated  
411 in boiling citrate buffer solution for 15 min in plastic dishes, and subsequently allowed to cool  
412 down to room temperature over 3 hr. Endogenous peroxidase activity was blocked by immersing  
413 the slides in hydrogen peroxide buffer (10%, Sinopharm Chemical Reagent) for 15 min at room  
414 temperature and were then washed with PBS. Blocking buffer (1% bovine serum albumin in  
415 PBS) was added and the slides were incubated for 2 hr at room temperature. Primary antibody  
416 against phospho-MLKL, cleaved-caspase-3, and 8-OHdG was incubated overnight at 4°C in  
417 PBS. After 3 washes with PBS, slides were incubated with secondary antibody (polymer-  
418 horseradish-peroxidase-labeled anti-rabbit, Sigma) in PBS. After a further 3 washes, slides were  
419 analyzed using a diaminobutyric acid substrate kit (Thermo). Slides were counter stained with  
420 haematoxylin and mounted in neutral balsam medium (Sinopharm Chemical).

421 Immunohistochemistry analysis for RIP3 was performed by incubating the tissue slides with  
422 the indicated antibodies overnight at 4°C in PBS. After 3 washes with PBS, slides were  
423 incubated with DyLight-561 conjugated goat anti-rabbit secondary antibodies (Life) in PBS for 8  
424 hr at 4°C. After additional 3 washes, slides were incubated with HSD3B1, GATA-1, or UTF1  
425 antibody overnight at 4°C in PBS. The slides were then washed 3 more times before incubated  
426 with DyLight-488 conjugated goat anti-mouse/rat secondary antibodies (Life) for 2 hr at room  
427 temperature in PBS. The slides were then washed in PBS, and cell nuclei were then counter-  
428 stained with DAPI (Invitrogen) in PBS. The fluorescence images were observed using a Nikon  
429 A1-R confocal microscope.

### 430 **TSZ injection of testis**

431 WT, RIP3<sup>-/-</sup>, and MLKL<sup>-/-</sup> mice were anaesthetized with injection of 20 $\mu$ l g<sup>-1</sup> avertin (20  
432 mg ml<sup>-1</sup>). The abdomen was opened with surgical scissors and the testes were taken out one-by-  
433 one. Each testis was then injected with 20 ng ml<sup>-1</sup> T in the presence of S (100 nM) and Z (20  
434  $\mu$ M) (15 $\mu$ l, T: S: Z=1:1:1), or saline, with microliter syringes (50  $\mu$ l). Each testis was then put  
435 back into the cavity, and the abdomen was sutured as described in Hooley et al., 2009). Mice  
436 were maintained in an SPF animal facility.

### 437 **Sperm count**

438 Mice were sacrificed and their epididymides were harvested. Each epididymis was  
439 punctured with a 25-gauge needle. Sperm were extruded with tweezers from the epididymis and  
440 collected in 2 ml of PBS. The solution was strained with a cell strainer (40  $\mu$ m, BD Falcon), and  
441 5  $\mu$ l was taken out and diluted in 95  $\mu$ l PBS. The number of sperm was counted using a cell-  
442 counting chamber under a microscope (Schurmann et al., 2002).

### 443 **Mating and fertility test**

444 Mice (male) used for the fertility tests were housed individually in an SPF barrier facility.  
445 To assess vaginal patency, mice were examined daily from weaning until vaginal opening was  
446 observed. The fertility rate of males was determined via a standard method (Cooke and Saunders,  
447 2002; Hofmann et al., 2015) by mating a male with a series of pairs of 10-week old wild type  
448 females for 3 months; females were replaced every 2 weeks (females were either from our  
449 colony or purchased from Vital River Laboratory Co(C57BL/6)). Each litters was assessed from  
450 the date of the birth of pups; when pups were born but did not survive, we counted and recorded  
451 the number dead pups; for females that did not produce offspring, the number of pups was

452 recorded as '0'(did not produce a litter with a proven breeder male for a period of 2 months).

453 The number of male mice with reproductive capacity was recorded.

454 The reproductive longevity of males was determined by continuously housing 2-month old  
455 RIP3<sup>+/+</sup> and RIP3<sup>-/-</sup> males with a pairs of 10-week old wild type females, the females being  
456 replaced every 2 months, until males ceased reproducing (calculated as the age at birth of the  
457 litter less 21 days) (Hofmann et al., 2015).

#### 458 **Isolation of cells from testes**

459 Testes from 8-week old mice were collected using a previously-reported protocol (Chang  
460 et al., 2011). Briefly, a testis was placed in Enriched DMEM:F12 (Hyclone) media and placed on  
461 ice. After removal of the tunica albuginea of a testis, the seminiferous tubules were dissociated  
462 and transferred immediately into 10 mL of protocol enzymatic solution 1. Tubules were  
463 incubated for 15-20 min at 35°C in a shaking water bath at 80 oscillations (osc)/min and were  
464 then layered over 40 mL 5% Percoll/95% 1× Hank's balanced salt solution in a 50 mL conical  
465 tube and allowed to settle for 20 min. Leydig cells were isolated from the top 35 mL of the total  
466 volume of Percoll. The bottom 5 mL of Percoll was transferred to a fresh 50 mL conical tube  
467 containing 10 mL enzymatic solution 2. Tubules were incubated for 20 min at 35°C and 80  
468 osc/min. After incubation, 3 mL charcoal-stripped FBS was immediately added to halt the  
469 digestion. All fractions were mixed and immediately centrifuged at 500 × g at 4°C for 10 min.  
470 Pellets were re-suspended in PBS and washed 3 times, then cultured in DMEM:F12(10%FBS)  
471 medium at 37°C.

#### 472 **RIPA-56 feeding experiment**

473 RIPA-56 in the AIN93G (LAD3001G) at 150 or 300 mg/kg was produced based on the  
474 Trophic Animal Feed High-tech Co's protocol. Cohorts of 13-month old wild type male mice

475 were fed with AIN93G or AIN93G containing RIPA-56 (RIPA-56:300mg/kg) for 2 months in an  
476 SPF facility; each male mouse was then mated with four 10-week old wild type female mice  
477 successively. The number of male mice with reproductive capacity were recorded.

#### 478 **Statistical analysis**

479 All experiments were repeated at least twice. Data represent biological replicates.  
480 Statistical tests were used for every type of analysis. The data meet the assumptions of the  
481 statistical tests described for each figure. Results are expressed as the mean  $\pm$  s.e.m or S.D.  
482 Differences between experimental groups were assessed for significance using a two-tailed  
483 unpaired Student's *t*-tests implanted in GraphPad prism5 or Excel software. Fertility rates were  
484 assessed for significance using chi-square tests (unpaired, two-tailed) implemented in GraphPad  
485 prism5 software. The  $*P < 0.05$ ,  $**P < 0.01$ , and  $***P < 0.001$  levels were considered significant.  
486 NS, not significant.

487

#### 488 **Competing interests**

489 The authors declare no competing interests.

490

#### 491 **Acknowledgements**

492 We thank Drs. Joseph Goldstein and Michael Brown for critically reading the manuscript and  
493 thank Dr. John Snyder and Alex Wang for editing the manuscript.

494

#### 495 **Additional information**

#### 496 **Funding**

497 This work was supported by a National Basic Science 973 grants (2013CB530805) from the  
498 Chinese Ministry of Science and Technology and by the Beijing Municipal Commission of  
499 Science and Technology. The funders had no role in study design, data collection and  
500 interpretation, or the decision to submit the work for publication.

501

502

503

#### 504 **Author Contributions**

505 X.W., D.L. and L.M. conception and design; D.L., T.X., and L.M acquisition of data; Y.S, X.L  
506 and Z.Z. synthesized and provided RIPA-56; D.L. and X.W. analysis and interpretation of the  
507 data; X.W , and D.L drafting the article. All authors discussed the results and commented on the  
508 article.

509

#### 510 **Ethics**

511 All animal experiments were conducted following the Ministry of Health national guidelines for  
512 the housing and care of laboratory animals and were performed in accordance with institutional  
513 regulations after review and approval by the Institutional Animal Care and Use Committee at  
514 National Institute of Biological Sciences, Beijing.

515

#### 516 **References:**

517 Cai, Z., Jitkaew, S., Zhao, J., Chiang, H.C., Choksi, S., Liu, J., Ward, Y., Wu, L.G., and Liu, Z.G.  
518 (2014). Plasma membrane translocation of trimerized MLKL protein is required for TNF-induced  
519 necroptosis. *Nat Cell Biol* 16, 55-65.

520 Chang, Y.F., Lee-Chang, J.S., Panneerdoss, S., MacLean, J.A., 2nd, and Rao, M.K. (2011).  
521 Isolation of Sertoli, Leydig, and spermatogenic cells from the mouse testis. *Biotechniques* 51,  
522 341-342, 344.

523 Chen, X., Li, W., Ren, J., Huang, D., He, W.T., Song, Y., Yang, C., Li, W., Zheng, X., Chen, P., *et*  
524 *al.* (2014). Translocation of mixed lineage kinase domain-like protein to plasma membrane leads  
525 to necrotic cell death. *Cell Res* 24, 105-121.

526 Chigurupati, S., Son, T.G., Hyun, D.H., Lathia, J.D., Mughal, M.R., Savell, J., Li, S.C., Nagaraju,  
527 G.P., Chan, S.L., Arumugam, T.V., *et al.* (2008). Lifelong running reduces oxidative stress and  
528 degenerative changes in the testes of mice. *J Endocrinol* 199, 333-341.

529 Cho, Y.S., Challa, S., Moquin, D., Genga, R., Ray, T.D., Guildford, M., and Chan, F.K. (2009).  
530 Phosphorylation-driven assembly of the RIP1-RIP3 complex regulates programmed necrosis and  
531 virus-induced inflammation. *Cell* 137, 1112-1123.

532 Christofferson, D.E., and Yuan, J. (2010). Necroptosis as an alternative form of programmed cell  
533 death. *Curr Opin Cell Biol* 22, 263-268.

534 Cooke, H.J., and Saunders, P.T. (2002). Mouse models of male infertility. *Nat Rev Genet* 3, 790-  
535 801.

536 Degterev, A., Hitomi, J., Gemscheid, M., Ch'en, I.L., Korkina, O., Teng, X., Abbott, D., Cuny,  
537 G.D., Yuan, C., Wagner, G., *et al.* (2008). Identification of RIP1 kinase as a specific cellular  
538 target of necrostatins. *Nat Chem Biol* 4, 313-321.

539 Finch, C.E., and Girgis, F.G. (1974). Enlarged seminal vesicles of senescent C57BL-6J mice. *J*  
540 *Gerontol* 29, 134-138.

541 Gonzales, G.F. (2001). Function of seminal vesicles and their role on male fertility. *Asian J*  
542 *Androl* 3, 251-258.



543 He, S., Wang, L., Miao, L., Wang, T., Du, F., Zhao, L., and Wang, X. (2009). Receptor interacting  
544 protein kinase-3 determines cellular necrotic response to TNF-alpha. *Cell* *137*, 1100-1111.

545 Hentrich, A., Wolter, M., Szardening-Kirchner, C., Luers, G.H., Bergmann, M., Kliesch, S., and  
546 Konrad, L. (2011). Reduced numbers of Sertoli, germ, and spermatogonial stem cells in  
547 impaired spermatogenesis. *Mod Pathol* *24*, 1380-1389.

548 Hofmann, J.W., Zhao, X., De Cecco, M., Peterson, A.L., Pagliaroli, L., Manivannan, J., Hubbard,  
549 G.B., Ikeno, Y., Zhang, Y., Feng, B., *et al.* (2015). Reduced expression of MYC increases  
550 longevity and enhances healthspan. *Cell* *160*, 477-488.

551 Holler, N., Zaru, R., Micheau, O., Thome, M., Attinger, A., Valitutti, S., Bodmer, J.L., Schneider, P.,  
552 Seed, B., and Tschopp, J. (2000). Fas triggers an alternative, caspase-8-independent cell death  
553 pathway using the kinase RIP as effector molecule. *Nat Immunol* *1*, 489-495.

554 Hooley, R.P., Paterson, M., Brown, P., Kerr, K., and Saunders, P.T. (2009). Intra-testicular  
555 injection of adenoviral constructs results in Sertoli cell-specific gene expression and disruption  
556 of the seminiferous epithelium. *Reproduction* *137*, 361-370.

557 Johnson, S.L., Dunleavy, J., Gemmell, N.J., and Nakagawa, S. (2015). Consistent age-dependent  
558 declines in human semen quality: a systematic review and meta-analysis. *Ageing research*  
559 *reviews* *19*, 22-33.

560 Jung, H., Roser, J.F., and Yoon, M. (2014). UTF1, a putative marker for spermatogonial stem  
561 cells in stallions. *PLoS One* *9*, e108825.

562 Meng, L., Jin, W., and Wang, X. (2015). RIP3-mediated necrotic cell death accelerates  
563 systematic inflammation and mortality. *Proc Natl Acad Sci U S A* *112*, 11007-11012.

564 Murphy, J.M., Czabotar, P.E., Hildebrand, J.M., Lucet, I.S., Zhang, J.G., Alvarez-Diaz, S., Lewis,  
565 R., Lalaoui, N., Metcalf, D., Webb, A.I., *et al.* (2013). The pseudokinase MLKL mediates  
566 necroptosis via a molecular switch mechanism. *Immunity* *39*, 443-453.

567 Newton, K., Sun, X., and Dixit, V.M. (2004). Kinase RIP3 is dispensable for normal NF-kappa Bs,  
568 signaling by the B-cell and T-cell receptors, tumor necrosis factor receptor 1, and Toll-like  
569 receptors 2 and 4. *Molecular and cellular biology* 24, 1464-1469.

570 Paul, C., Nagano, M., and Robaire, B. (2011). Aging results in differential regulation of DNA  
571 repair pathways in pachytene spermatocytes in the Brown Norway rat. *Biol Reprod* 85, 1269-  
572 1278.

573 Pettan-Brewer, C., and Treuting, P.M. (2011). Practical pathology of aging mice. *Pathobiol Aging*  
574 *Age Relat Dis* 1.

575 Ren, Y., Su, Y., Sun, L., He, S., Meng, L., Liao, D., Liu, X., Ma, Y., Liu, C., Li, S., *et al.* (2017).  
576 Discovery of a Highly Potent, Selective, and Metabolically Stable Inhibitor of Receptor-  
577 Interacting Protein 1 (RIP1) for the Treatment of Systemic Inflammatory Response Syndrome.  
578 *Journal of medicinal chemistry* 60, 972-986.

579 Robinson, N., McComb, S., Mulligan, R., Dudani, R., Krishnan, L., and Sad, S. (2012). Type I  
580 interferon induces necroptosis in macrophages during infection with *Salmonella enterica* serovar  
581 Typhimurium. *Nature immunology* 13, 954-962.

582 Rodriguez, D.A., Weinlich, R., Brown, S., Guy, C., Fitzgerald, P., Dillon, C.P., Oberst, A., Quarato,  
583 G., Low, J., Cripps, J.G., *et al.* (2016). Characterization of RIPK3-mediated phosphorylation of  
584 the activation loop of MLKL during necroptosis. *Cell Death Differ* 23, 76-88.

585 Schurmann, A., Kolling, S., Jacobs, S., Saftig, P., Krauss, S., Wennemuth, G., Kluge, R., and  
586 Joost, H.G. (2002). Reduced sperm count and normal fertility in male mice with targeted  
587 disruption of the ADP-ribosylation factor-like 4 (Arl4) gene. *Mol Cell Biol* 22, 2761-2768.

588 Sun, L., Wang, H., Wang, Z., He, S., Chen, S., Liao, D., Wang, L., Yan, J., Liu, W., Lei, X., *et al.*  
589 (2012). Mixed lineage kinase domain-like protein mediates necrosis signaling downstream of  
590 RIP3 kinase. *Cell* 148, 213-227.

591 Tsai, M.Y., Yeh, S.D., Wang, R.S., Yeh, S., Zhang, C., Lin, H.Y., Tzeng, C.R., and Chang, C.  
592 (2006). Differential effects of spermatogenesis and fertility in mice lacking androgen receptor in  
593 individual testis cells. *Proc Natl Acad Sci U S A* *103*, 18975-18980.

594 Upton, J.W., Kaiser, W.J., and Mocarski, E.S. (2010). Virus inhibition of RIP3-dependent necrosis.  
595 *Cell host & microbe* *7*, 302-313.

596 van Bragt, M.P., Roepers-Gajadien, H.L., Korver, C.M., Bogerd, J., Okuda, A., Eggen, B.J., de  
597 Rooij, D.G., and van Pelt, A.M. (2008). Expression of the pluripotency marker UTF1 is restricted  
598 to a subpopulation of early A spermatogonia in rat testis. *Reproduction* *136*, 33-40.

599 Vandenabeele, P., Galluzzi, L., Vanden Berghe, T., and Kroemer, G. (2010). Molecular  
600 mechanisms of necroptosis: an ordered cellular explosion. *Nat Rev Mol Cell Biol* *11*, 700-714.

601 Vermeulen, A., Kaufman, J.M., and Giagulli, V.A. (1996). Influence of some biological indexes on  
602 sex hormone-binding globulin and androgen levels in aging or obese males. *The Journal of*  
603 *clinical endocrinology and metabolism* *81*, 1821-1826.

604 Wang, H., Sun, L., Su, L., Rizo, J., Liu, L., Wang, L.F., Wang, F.S., and Wang, X. (2014). Mixed  
605 lineage kinase domain-like protein MLKL causes necrotic membrane disruption upon  
606 phosphorylation by RIP3. *Molecular cell* *54*, 133-146.

607 Wang, L., Du, F., and Wang, X. (2008). TNF-alpha induces two distinct caspase-8 activation  
608 pathways. *Cell* *133*, 693-703.

609 Wu, J., Huang, Z., Ren, J., Zhang, Z., He, P., Li, Y., Ma, J., Chen, W., Zhang, Y., Zhou, X., *et al.*  
610 (2013). MIK1 knockout mice demonstrate the indispensable role of MIK1 in necroptosis. *Cell*  
611 *research* *23*, 994-1006.

612 Zhang, D.W., Shao, J., Lin, J., Zhang, N., Lu, B.J., Lin, S.C., Dong, M.Q., and Han, J. (2009).  
613 RIP3, an energy metabolism regulator that switches TNF-induced cell death from apoptosis to  
614 necrosis. *Science* *325*, 332-336.

615 Zhou, W., and Yuan, J. (2014). Necroptosis in health and diseases. *Seminars in cell &*  
616 *developmental biology* 35, 14-23.

617

618

619

620

621

622 **Figure**

**Figure1**

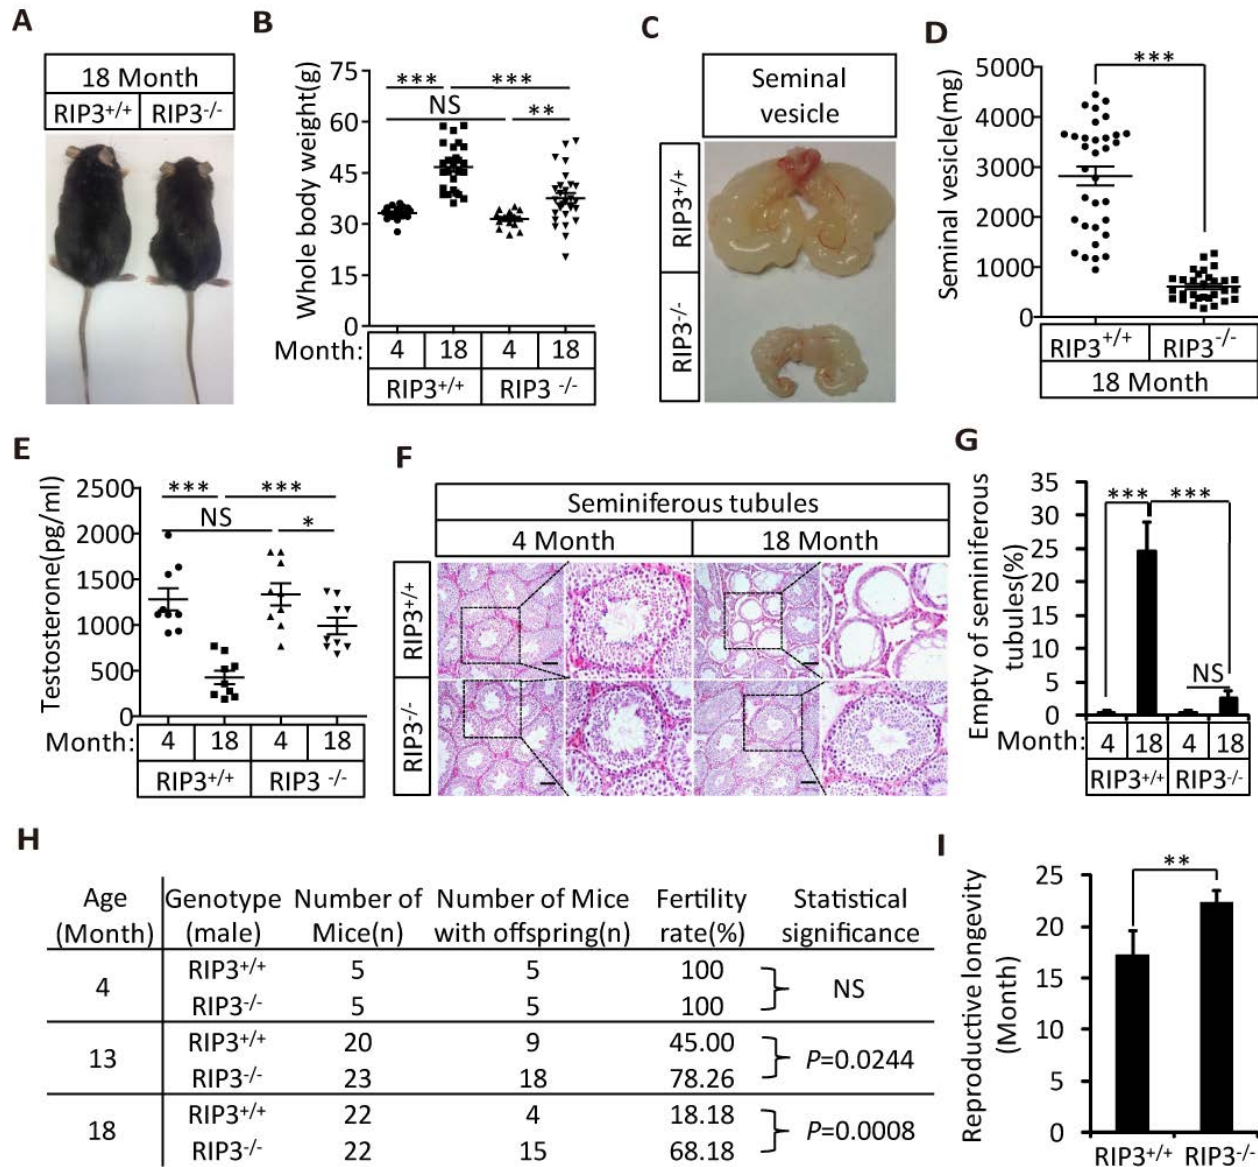

623

624 **Figure1.** RIP3<sup>-/-</sup> mice maintained their reproductive system function at an advanced age.

625 (A, B) Macroscopic features and weights of RIP3<sup>+/+</sup> (wild type) and RIP3<sup>-/-</sup> (RIP3 knockout)

626 male mice. RIP3<sup>+/+</sup> (4 Month, n=16; 18 Month, n=27) and RIP3<sup>-/-</sup> (4 Month, n=16; 18 Month,

627 n=27) male mice were photographed and weighed. Data represent the mean ± the standard error

628 of the mean (s.e.m). \*\*P<0.01, \*\*\*P<0.001. P values were determined with unpaired

629 Student's *t*-tests. NS, not significant.

630 (C, D) Macroscopic features and weights of seminal vesicles. Mice were sacrificed at 18 months  
631 of age, and the seminal vesicles from RIP3<sup>+/+</sup> (n=33) and RIP3<sup>-/-</sup> (n=30) mice were photographed  
632 and weighed. Data represent the mean  $\pm$  s.e.m. \*\*\* $P$ <0.001.  $P$  values were determined with  
633 unpaired Student's  $t$ -tests.

634 (E) Serum testosterone levels of mice assayed using ELISA. Mice were sacrificed, and the  
635 testosterone levels in serum from RIP3<sup>+/+</sup> (4 Month, n=9; 18 Month, n=9) and RIP3<sup>-/-</sup>(4 Month,  
636 n= 9; 18 Month, n=9) mice were measured using an ELISA kit for testosterone. Data represent  
637 the mean  $\pm$  s.e.m. \* $P$ <0.05, \*\*\* $P$ <0.001.  $P$  values were determined with unpaired Student's  $t$ -  
638 tests. NS, not significant.

639 (F, G) H&E of testis sections from RIP3<sup>+/+</sup> and RIP3<sup>-/-</sup> mice. RIP3<sup>+/+</sup> (4 Months, n=10; 18  
640 Months, n=10) and RIP3<sup>-/-</sup> (4 Months, n=10; 18 Months, n=10) mice were sacrificed and testes  
641 were harvested and stained with H&E in (F). The number of empty seminiferous tubules was  
642 counted based on H&E staining and quantification in (G), empty seminiferous tubules were  
643 counted in 5 fields per testis. Scale bar, 100 $\mu$ m. Data represent the mean  $\pm$  S.D. \*\*\* $P$ <0.001.  $P$   
644 values were determined with unpaired Student's  $t$ -tests. NS, not significant.

645 (H) Summary of the fertility rates of RIP3<sup>+/+</sup> and RIP3<sup>-/-</sup> mice. One male mice of a given age was  
646 mated with a pairs of 10-week old wild type female mice for 3 months; females were replaced  
647 every 2 weeks. The number of male mice with reproductive capacity was counted (see Materials  
648 and Methods).  $P$  values were determined using chi-square tests.

649 (I) Reproductive longevity. When RIP3<sup>+/+</sup> (n=12) and RIP3<sup>-/-</sup> (n=12) male mice were 2 months  
650 old, they were continuously mated with a pairs of 10-week old female mice until pregnancies  
651 ceased; females were replaced every 2 months. The ages of the males at which their last litter  
652 was sired was recorded (calculated as the age at birth of the litter less 21 days, see Materials and

653 Methods). Data represent the mean  $\pm$  S.D. **\*\*** $P < 0.01$ . *P* values were determined with unpaired  
654 Student's *t*-tests.

655 The following figure and table supplements are available for figure 1:

656 **Figure 1-figure supplement 1.** Morphological changes in seminal vesicles and testis during  
657 aging.

658 **Figure 1-figure supplement 2.** The levels of the pituitary endocrine hormones LH and FSH  
659 decline normally in RIP3<sup>+/+</sup> and RIP3<sup>-/-</sup> mice.

660 **Figure 1-figure supplement 3.** No morphological differences were apparent in the prostates of  
661 RIP3<sup>+/+</sup> and RIP3<sup>-/-</sup> mice.

662 **Figure 1-figure supplement 4.** Morphological changes in seminiferous tubules in 36-month old  
663 mice.

664 **Figure 1-figure supplement 5.** RIP3<sup>-/-</sup> mice have higher sperm counts than RIP3<sup>+/+</sup> mice at an  
665 advanced age.

666 **Figure 1-figure supplement 6.** Histological analysis of various organs of RIP3<sup>+/+</sup> and RIP3<sup>-/-</sup>  
667 mice.

668 **Figure 1-figure supplement 7.** Increase of rates of birth defects and oxidative damage in sperm  
669 from aged RIP3<sup>-/-</sup> mice.

670 **Figure 1-table supplement 1.** Summary of the fertility rates and mortality rates of the offspring  
671 of 4- or 18-month old RIP3<sup>+/+</sup> and RIP3<sup>-/-</sup> male mice.

672 **Figure 1-table supplement 2.** Summary of the fertility rates and mortality rates of the offspring  
673 of 13-month old RIP3<sup>+/+</sup> and RIP3<sup>-/-</sup> male mice.

674

**Figure2**

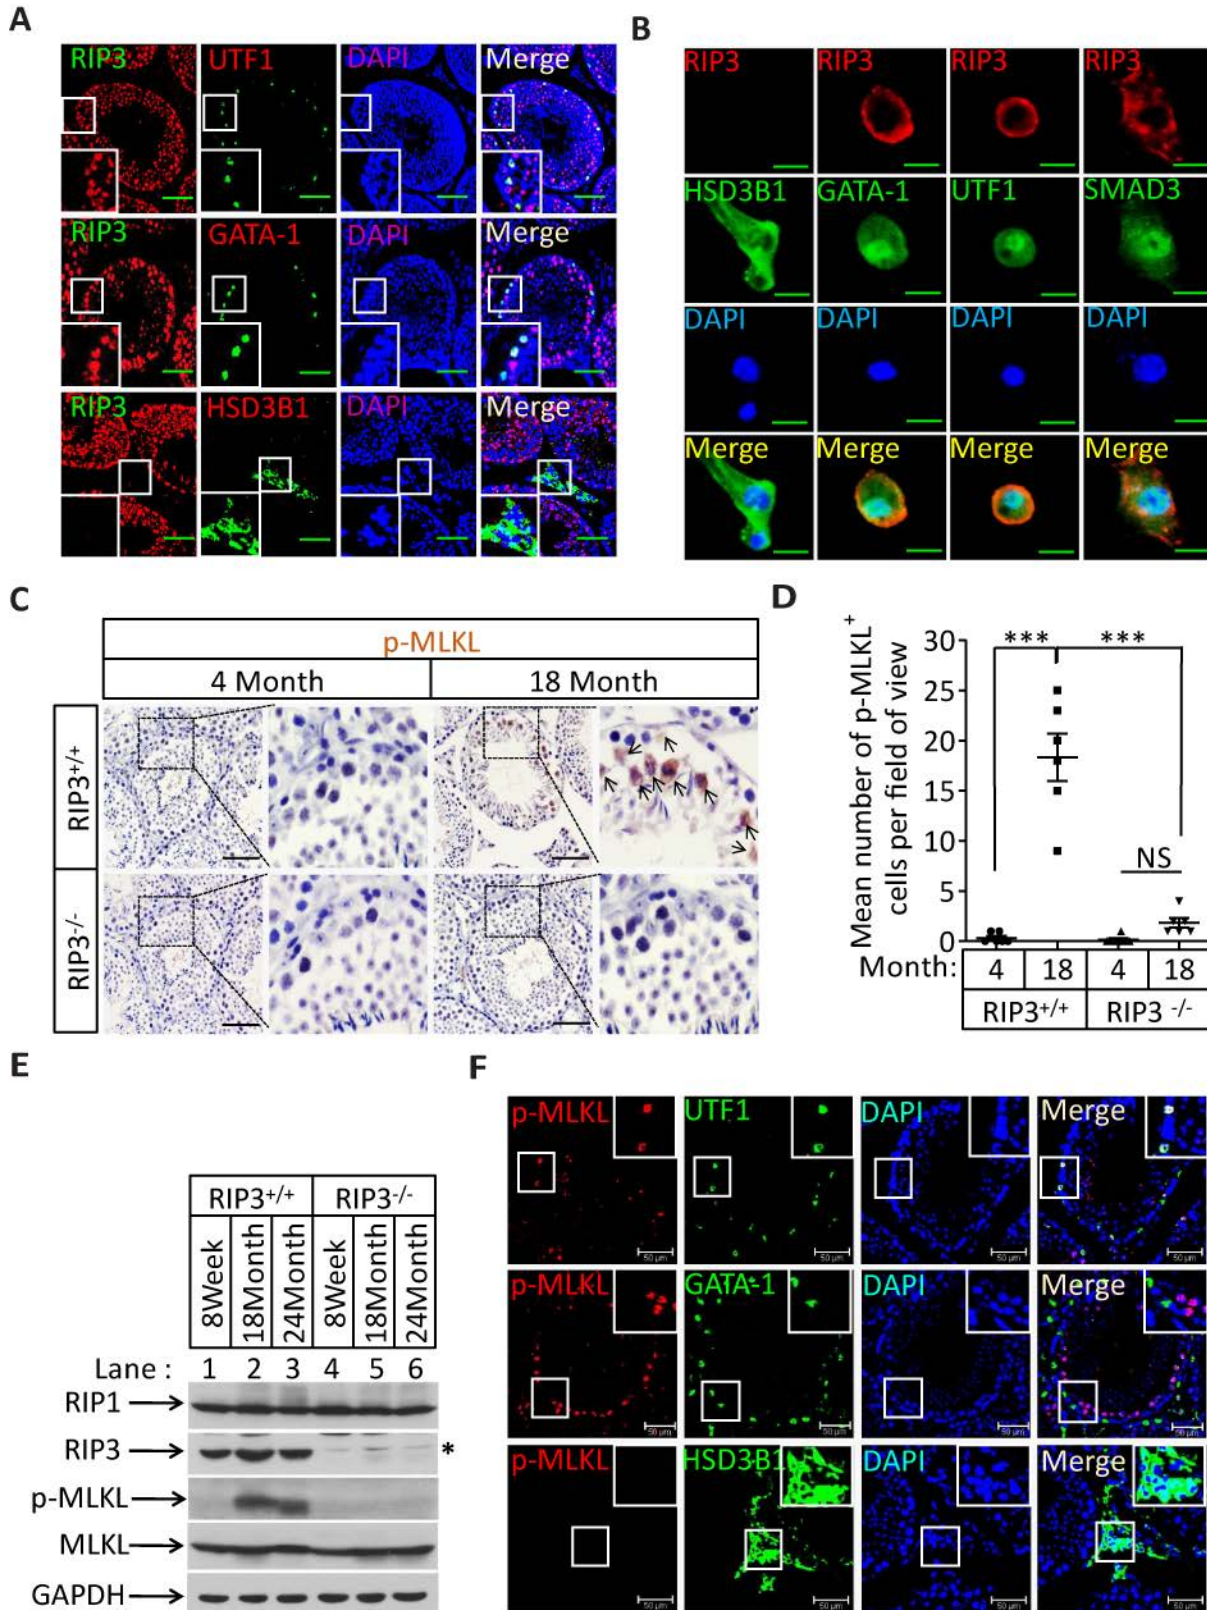

675



676 **Figure 2.** Necroptosis in seminiferous tubules of aged wild type mice.

677 **(A)** RIP3 expression in spermatogonia, Sertoli cells, and spermatocytes. Immunofluorescence in  
678 an 8-week old testis with antibodies against RIP3 (red), HSD3B1 (Leydig cells specific protein,  
679 green), GATA-1 (Sertoli cells specific protein, green), and UTF1 (spermatogonium specific  
680 protein, green). Scale bar, 100 $\mu$ m.

681 **(B)** RIP3 expression in germ line cells and Sertoli cells. Primary testis cells were isolated from  
682 wild type testes, Immunofluorescence of Leydig cells, Sertoli cells, spermatogonia, and primary  
683 spermatocytes with antibodies against RIP3 (red), HSD3B1 (green), GATA-1 (green), UTF1  
684 (green), and SMAD3 (primary spermatocytes specific protein, green). Counterstaining with  
685 DAPI, blue. Scale bar, 10 $\mu$ m.

686 **(C, D)** Immunohistochemistry (IHC) of testes from RIP3<sup>+/+</sup> and RIP3<sup>-/-</sup> mice with phosphor-  
687 MLKL (p-MLKL) antibody. RIP3<sup>+/+</sup> (4 Months, n=6; 18 Months, n=6) and RIP3<sup>-/-</sup> (4 Months,  
688 n=6; 18 Months, n=6) mice were sacrificed and testes were harvested and stained with p-MLKL  
689 antibody in (C) (black arrows indicate cells with p-MLKL staining). p-MLKL<sup>+</sup> cells were  
690 counted in 5 fields per testis and quantification in (D). Scale bar, 100 $\mu$ m. Data represent the  
691 mean  $\pm$  s.e.m. \*\*\* $P$ <0.001.  $P$  values were determined with unpaired Student's  $t$ -tests. NS, not  
692 significant.

693 **(E)** Western blot analysis of RIP1, RIP3, MLKL, and p-MLKL levels in the testis after perfusion,  
694 each group is representative of at least three mice. GAPDH was used as loading control. The  
695 asterisk (\*) indicates non-specific bands.

696 **(F)** Immunofluorescence in an 18-month old testis with antibodies against p-MLKL (red, purple  
697 arrows indicate spermatogonium with p-MLKL staining), HSD3B1, GATA-1, and UTF1. Scale  
698 bar, 50  $\mu$ m.

699 The following figure supplements are available for figure 2:

700 **Figure 2-figure supplement 1. RIP3 expression in seminiferous tubules.**

701

**Figure 3**  
**A**

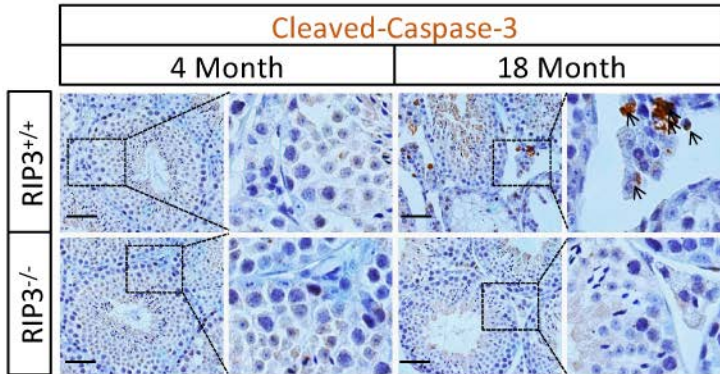

**B**

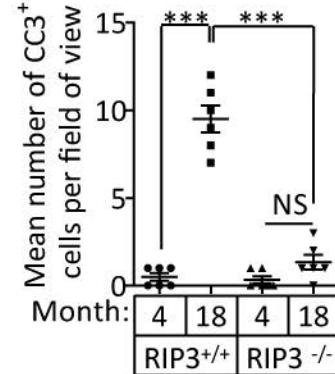

**C**

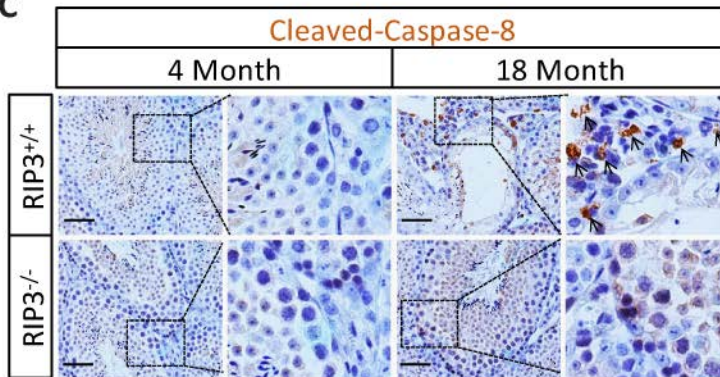

**D**

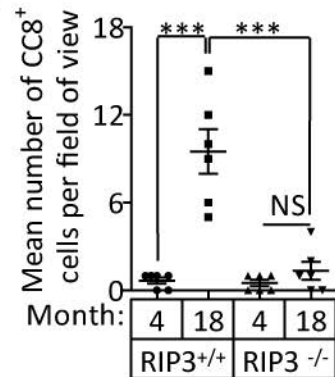

**E**

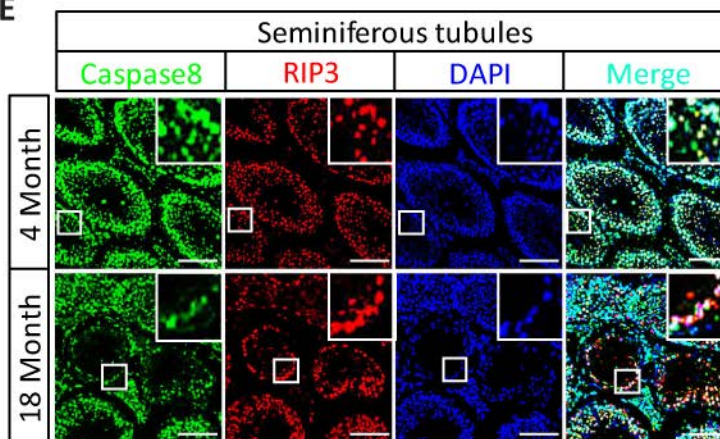

**F**

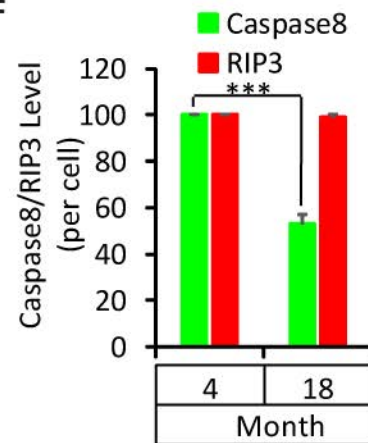

702

703

704 **Figure 3.** Activation of apoptosis in Leydig cells during aging.

705 (A, B) IHC of testis from RIP3<sup>+/+</sup> and RIP3<sup>-/-</sup> mice with Cleaved-Caspase-3 antibody. Mice were  
706 sacrificed, testes from RIP3<sup>+/+</sup> (4 Month, n=6; 18 Month, n=6) and RIP3<sup>-/-</sup> (4 Month, n=6; 18  
707 Month, n=6) mice were harvested and stained with Cleaved-Caspase-3 antibody in (A) (black  
708 arrows for Leydig cells with Cleaved-Caspase-3 staining). Cleaved-Caspase-3<sup>+</sup> cells were  
709 counted in 6 fields per testis and quantification in (B). Scale bar, 100µm. Data represent the  
710 mean ± s.e.m. \**P*<0.05, \*\*\**P*<0.001. *P* values were determined with unpaired Student's *t*-  
711 tests.

712 (C, D) IHC of testis from RIP3<sup>+/+</sup> and RIP3<sup>-/-</sup> mice with Cleaved-Caspase-8 antibody. Mice were  
713 sacrificed, testes from RIP3<sup>+/+</sup> (4 Month, n=6; 18 Month, n=6) and RIP3<sup>-/-</sup> (4 Month, n=6; 18  
714 Month, n=6) mice were harvested and stained with Cleaved-Caspase-8 antibody in (C) (black  
715 arrows for Leydig cells with Cleaved-Caspase-8 staining). Cleaved-Caspase-8<sup>+</sup> cells were  
716 counted in 6 fields per testis and quantification in (D). Scale bar, 100µm. Data represent the  
717 mean ± s.e.m. \**P*<0.05, \*\*\**P*<0.001. *P* values were determined with unpaired Student's *t*-  
718 tests.

719 (E, F) Caspase8 levels decrease during aging in empty seminiferous tubules.  
720 Immunofluorescence of testes from 4-Month old and 18-month old wild type mice with caspase8  
721 and RIP3 antibody in (E). The caspase8 levels were quantified in (F). Counterstaining with  
722 DAPI, blue. Scale bar, 100µm.

723 The following figure supplements are available for figure 3:

724 **Figure 3-figure supplement 1.** Activation of apoptosis in Leydig cells during aging.

725 **Figure 3-figure supplement 2.** Caspase8 levels increase during aging in Leydig cells.

726

727

**Figure4**

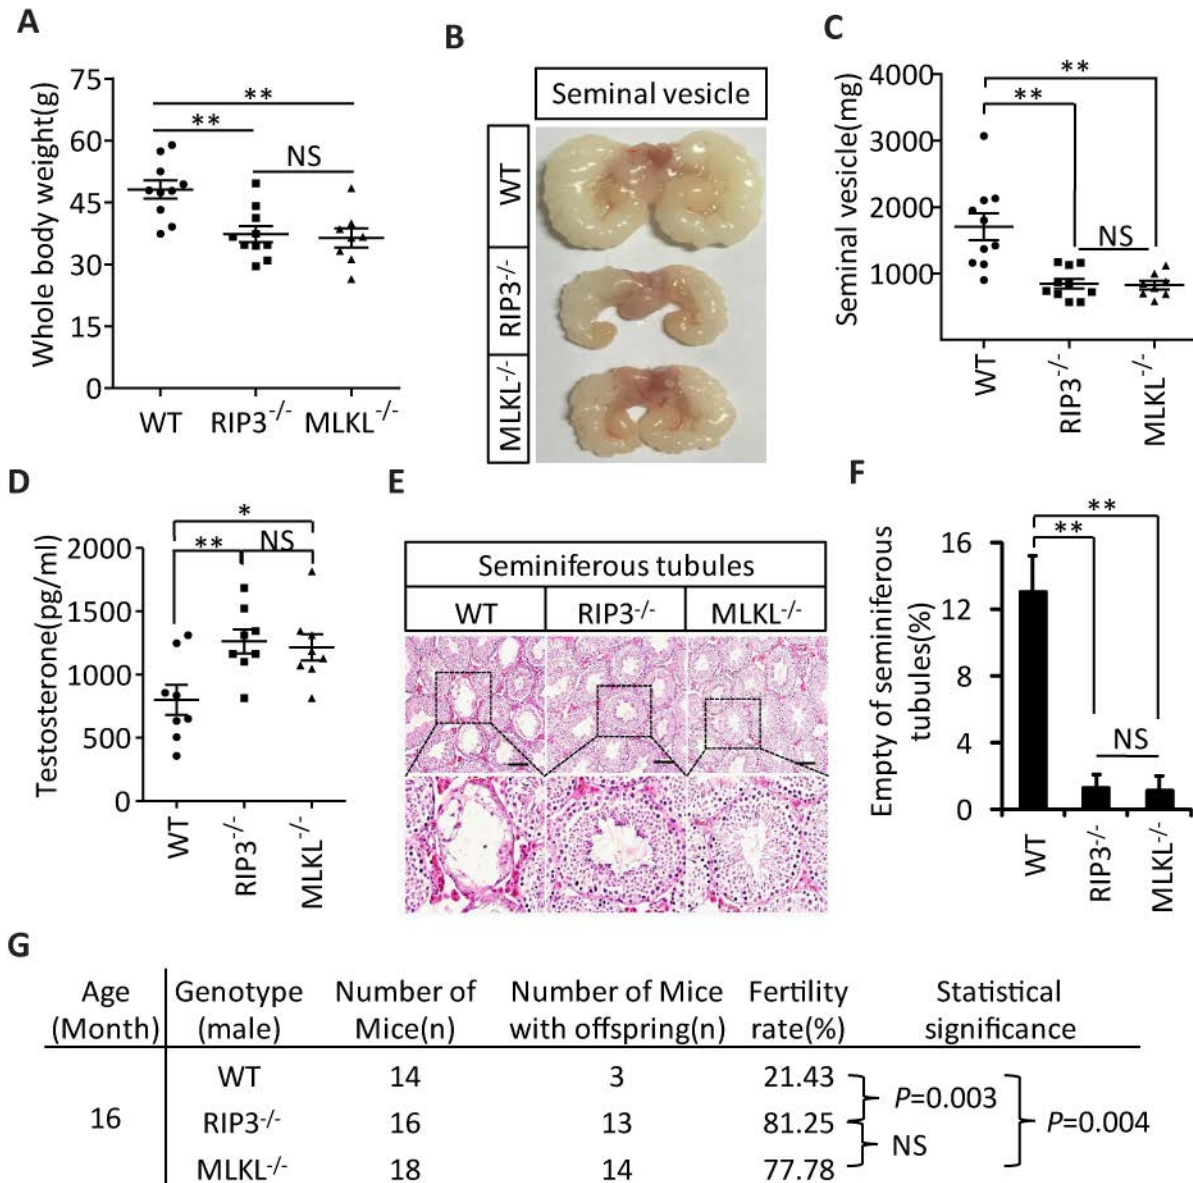

728

729

730 **Figure 4.** Aging of reproductive organs is delayed in MLKL<sup>-/-</sup> mice.

731 (A) Weight of WT (wild type), RIP3<sup>-/-</sup>, and MLKL<sup>-/-</sup> male mice. WT (15 Month, n=10), RIP3<sup>-/-</sup>

732 (15 Month, n=10) and MLKL<sup>-/-</sup> (15 Month, n=8) male mice were weighed. Data represent the

733 mean  $\pm$  s.e.m.  $**P < 0.01$ .  $P$  values were determined with unpaired Student's  $t$ -tests. NS, not  
734 significant.

735 **(B, C)** Macroscopic features and weights of seminal vesicles. WT (15 month, n=10), RIP3<sup>-/-</sup> (15  
736 Month, n=10) and MLKL<sup>-/-</sup> (15 Month, n=8) male mice were sacrificed and the seminal vesicles  
737 were photographed and weighed. Data represent the mean  $\pm$  s.e.m.  $**P < 0.01$ .  $P$  values were  
738 determined with unpaired Student's  $t$ -tests. NS, not significant.

739 **(D)** Serum testosterone levels of mice assayed using ELISA. Mice were sacrificed and the level  
740 of testosterone in serum from WT (15 Month, n=8), RIP3<sup>-/-</sup> (15 Month, n=8) and MLKL<sup>-/-</sup> (15  
741 Month, n=8) mice was measured using a testosterone ELISA kit. Data represent the mean  $\pm$   
742 s.e.m.  $*P < 0.05$ ,  $**P < 0.01$ .  $P$  values were determined with unpaired Student's  $t$ -tests. NS, not  
743 significant.

744 **(E, F)** H&E of testis sections from WT, RIP3<sup>-/-</sup>, and MLKL<sup>-/-</sup> mice. Testes from WT (15 Months,  
745 n=8), RIP3<sup>-/-</sup> (15 Months, n=8), and MLKL<sup>-/-</sup> (15 Month, n=8) mice were harvested and stained  
746 with H&E in (E). The number of empty seminiferous tubules was counted based on H&E  
747 staining and quantification in (F), empty seminiferous tubules were counted in 5 fields per testis.  
748 Scale bar, 100 $\mu$ m. Data represent the mean  $\pm$  S.D.  $**P < 0.01$ .  $P$  values were determined with  
749 unpaired Student's  $t$  tests.

750 **(G)** Summary of the fertility rates of WT, RIP3<sup>+/+</sup> and MLKL<sup>-/-</sup> mice. One male mice of a given  
751 age was mated with a pairs of 10-week old wild type female mice for 3 months; females were  
752 replaced every 2 weeks. The number of male mice with reproductive capacity was counted (see  
753 Materials and Methods).  $P$  values were determined using chi-square tests.

754

**Figure 5**

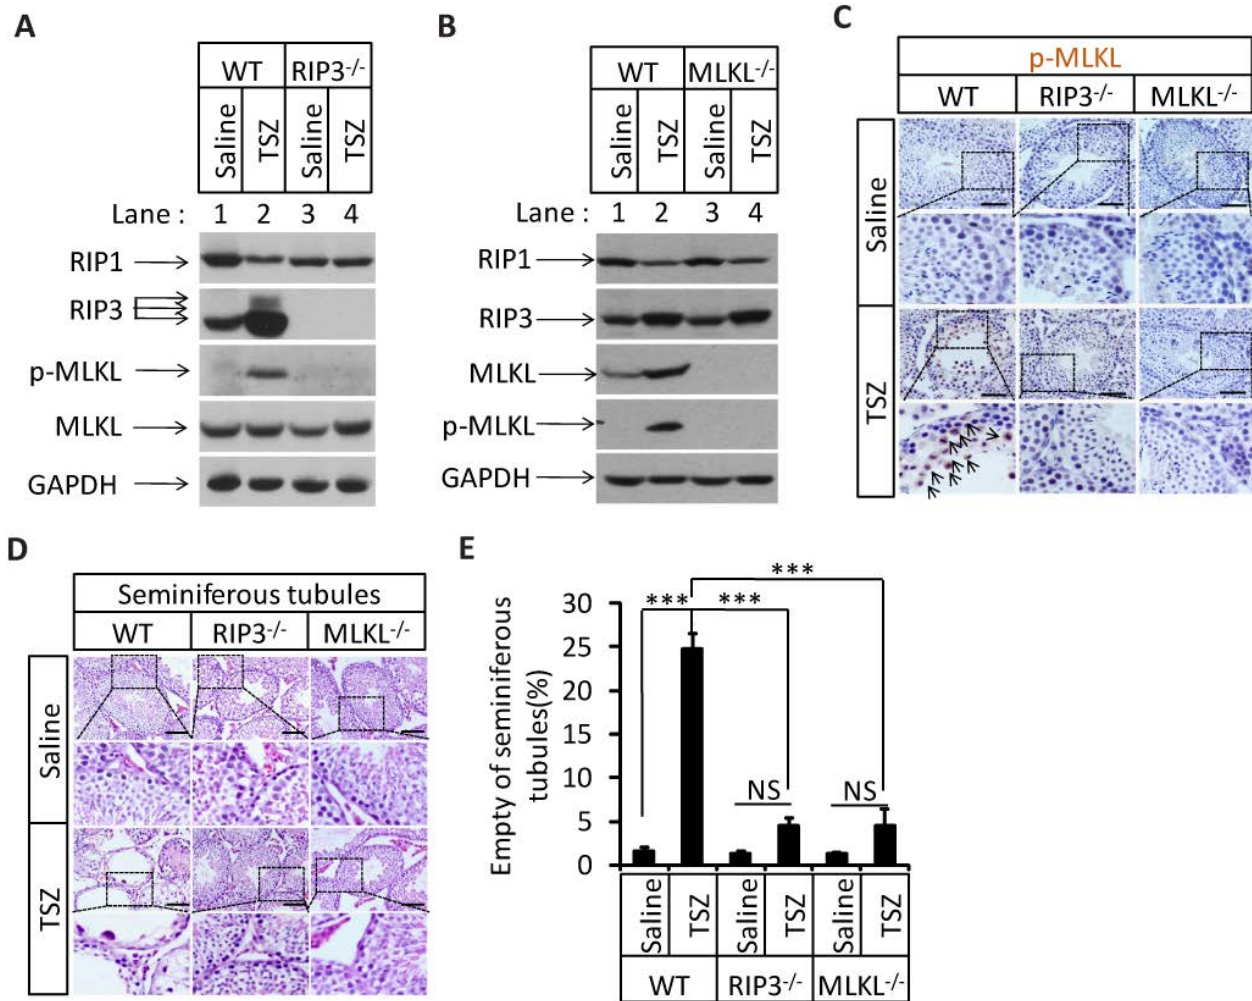

755

756

757 **Figure 5.** Induction of necroptosis in testis depleted cells in seminiferous tubules.

758 (A-E) Testes of WT (2 Months, n=6), RIP3<sup>-/-</sup> (2 Months, n=6), and MLKL<sup>-/-</sup> (2 Month, n=6) mice

759 were injected with TSZ or saline (see Materials and Methods); 72 hours after the injection, mice

760 were sacrificed and the testes were harvested. The proteins were extracted from testes and were

761 analyzed with western blotting in (A, B). GAPDH was used as a loading control. The testes were

762 stained with p-MLKL antibody in (C) (black arrows indicate cells with p-MLKL staining). Scale

763 bar, 100µm. The testes were stained with H&E in (D). The number of empty seminiferous

764 tubules was counted based on H&E staining and quantification in (E), empty seminiferous  
765 tubules were counted in 5 fields per testis. Scale bar, 100 $\mu$ m. Data represent the mean  $\pm$ S.D.

766 \*\*\* $P < 0.001$ .  $P$  values were determined with unpaired Student's  $t$ -tests. NS, not significant.

767 The following figure supplements are available for figure 5:

768 **Figure 5-figure supplement 1.** Activation of necroptosis in germ line stem cells and Sertoli  
769 cells in seminiferous tubules.

770

**Figure6**

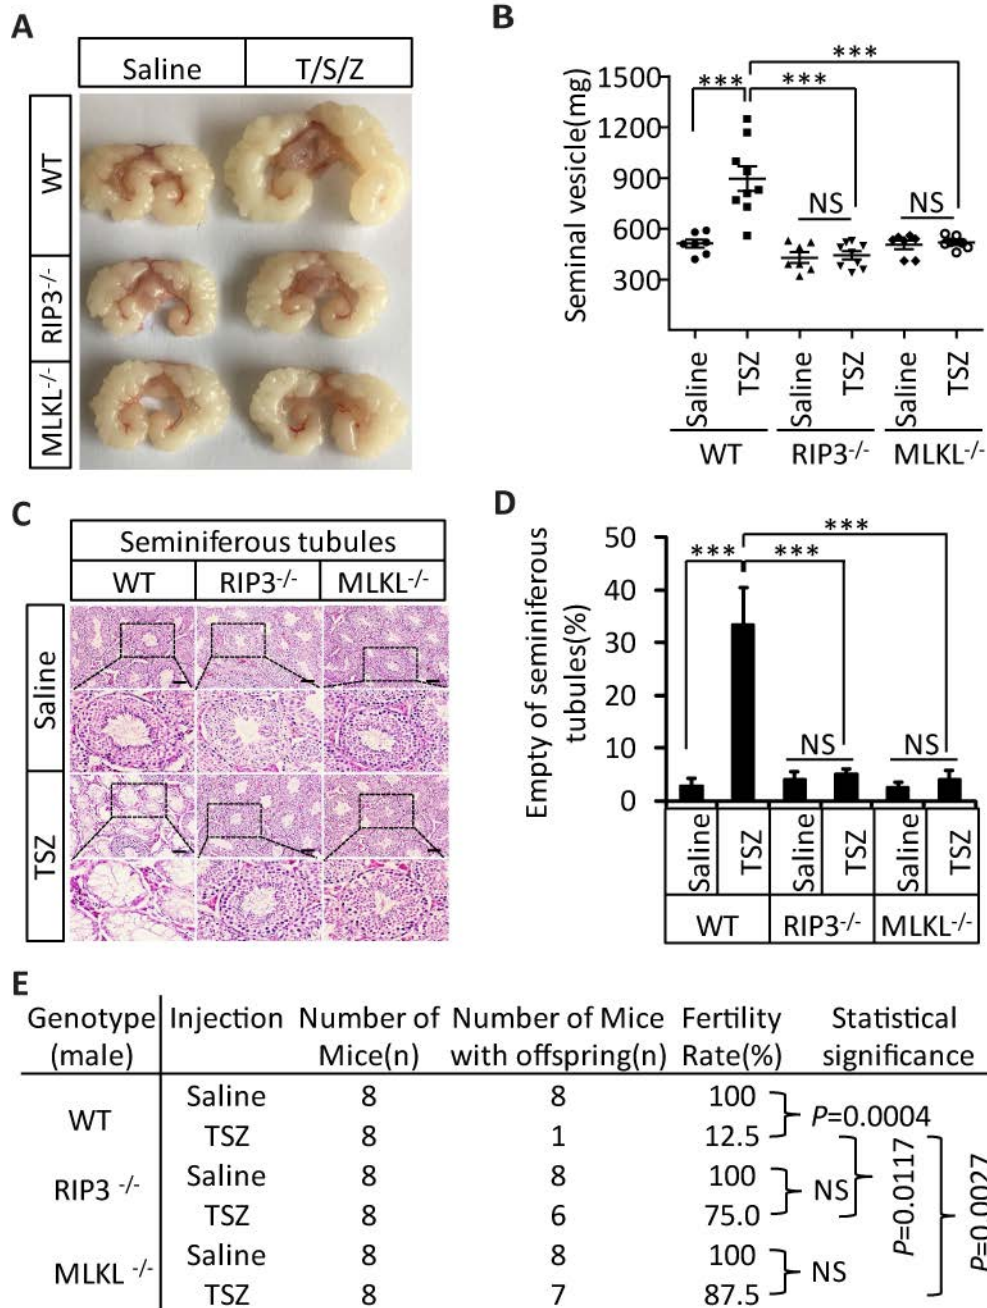

771

772

773 **Figure 6.** Induction of necroptosis in testes accelerates aging of the male reproductive system.

774 (A-D) Testes from WT (3 Months, n=9), RIP3<sup>-/-</sup> (3 Months, n= 9), and MLKL<sup>-/-</sup>(3 Month, n=7)

775 mice were injected with TSZ or saline (see Materials and Methods) and were maintained in SPF



776 facility for 3 months. Mice were then sacrificed and the seminal vesicles were photographed and  
777 weighed. Macroscopic features and weights of seminal vesicles from mice in (A, B). Data  
778 represent the mean  $\pm$  s.e.m. \*\*\* $P < 0.001$ ,  $P$  values were determined with unpaired Student's  $t$ -  
779 tests. Testes were harvested and stained with H&E in (C). The number of empty seminiferous  
780 tubules was counted based on H&E staining and quantification in (D). Empty seminiferous  
781 tubules were counted in 5 fields per testis. Scale bar, 100 $\mu$ m. Data represent the mean  $\pm$  S.D.  
782 \*\*\* $P < 0.001$ ,  $P$  values were determined with unpaired Student's  $t$ -tests. NS, not significant.

783 (E) Summary of the fertility rate of WT, RIP3<sup>-/-</sup>, and MLKL<sup>-/-</sup> male mice after injection with  
784 TSZ. Testes from WT (3 Months, n=8), RIP3<sup>-/-</sup> (3 Months, n=8), and MLKL<sup>-/-</sup> (3 Month, n=8)  
785 male mice were injected with TSZ or saline (see Materials and Methods) and mice were  
786 maintained in SPF for 3 months. One male mouse was mated with a pair of 10-week old female  
787 wild type mice for 2 months; females were replaced every 2 weeks. The number of male mice  
788 with reproductive capacity was counted (see Materials and Methods).  $P$  values were determined  
789 using chi-square tests.

**Figure7**

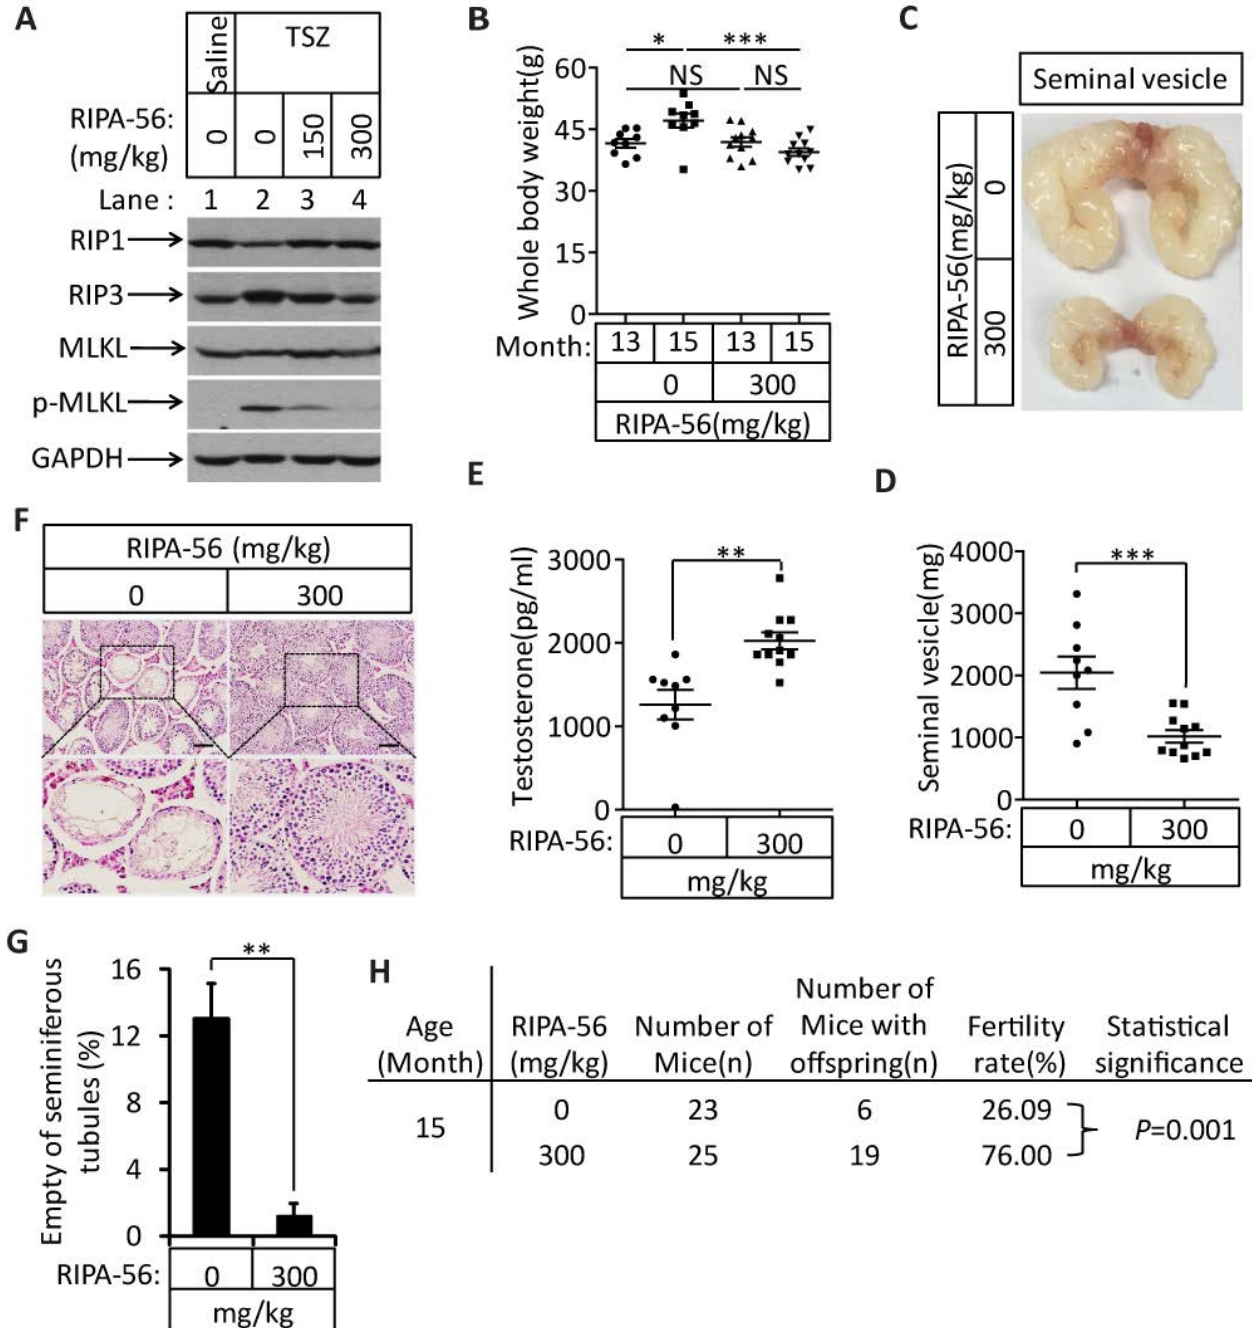

790

791

792 **Figure 7.** An RIP1 inhibitor blocks aging of the male reproductive system.

793 (A) Western blot analysis of RIP1, RIP3, MLKL, and p-MLKL levels in testes after injection

794 with TSZ. The 2-month old wild type male mice continuously feed with RIPA-56 (0mg/kg, n=6;

795 150mg/kg, n=3; 300mg/kg, n=3) for one week. Testes were injected with TSZ (see Materials and  
796 Methods); 72 hours after the injection, mice were sacrificed and the testes were harvested. The  
797 proteins were extracted from testes and were analyzed with western blotting. GAPDH was used  
798 as a loading control.

799 **(B-H)** 13-month old wild type male mice were feed with AIN93G (RIPA-56:0mg/kg) or  
800 AIN93G-RIPA-56 (RIPA-56:300mg/kg) for 2 months in SPF facility. Mice were weighed before  
801 and after feed with RIPA-56 in (B). Data represent the mean  $\pm$  s.e.m.  $*P<0.05$ ,  $***P<0.001$ .  $P$   
802 values were determined with unpaired Student's  $t$ -tests. Mice were sacrificed and the seminal  
803 vesicles were photographed and weighed. Macroscopic features and weights of seminal vesicles  
804 form mice in (C, D). Data represent the mean  $\pm$  s.e.m.  $***P<0.001$ .  $P$  values were determined  
805 with unpaired Student's  $t$ -tests. Testosterone levels in serum from mice were measured using a  
806 testosterone ELISA kit in (E). Data represent the mean  $\pm$  s.e.m.  $**P<0.01$ .  $P$  values were  
807 determined with unpaired Student's  $t$ -tests. The testes were harvested and stained with H&E in  
808 (F). The number of empty seminiferous tubules was counted based on H&E staining and  
809 quantification in (G). Empty seminiferous tubules were counted in 5 fields per testis. Scale bar,  
810 100 $\mu$ m. Data represent the mean  $\pm$  S.D.  $**P<0.01$ .  $P$  values were determined with unpaired  
811 Student's  $t$ -tests. The fertility rate of each RIPA-56-treated (0mg/kg, n=23; 300mg/kg,  
812 n=25) male mice was assessed by mating it with four 10-week old wild type female mice  
813 successively (see Materials and Methods). The number of mice with reproductive capacity was  
814 counted in (H).  $P$  values were determined using chi-square tests.

815

816

817

818 **Figure Supplement**

**Figure1-Figure Supplement 1**

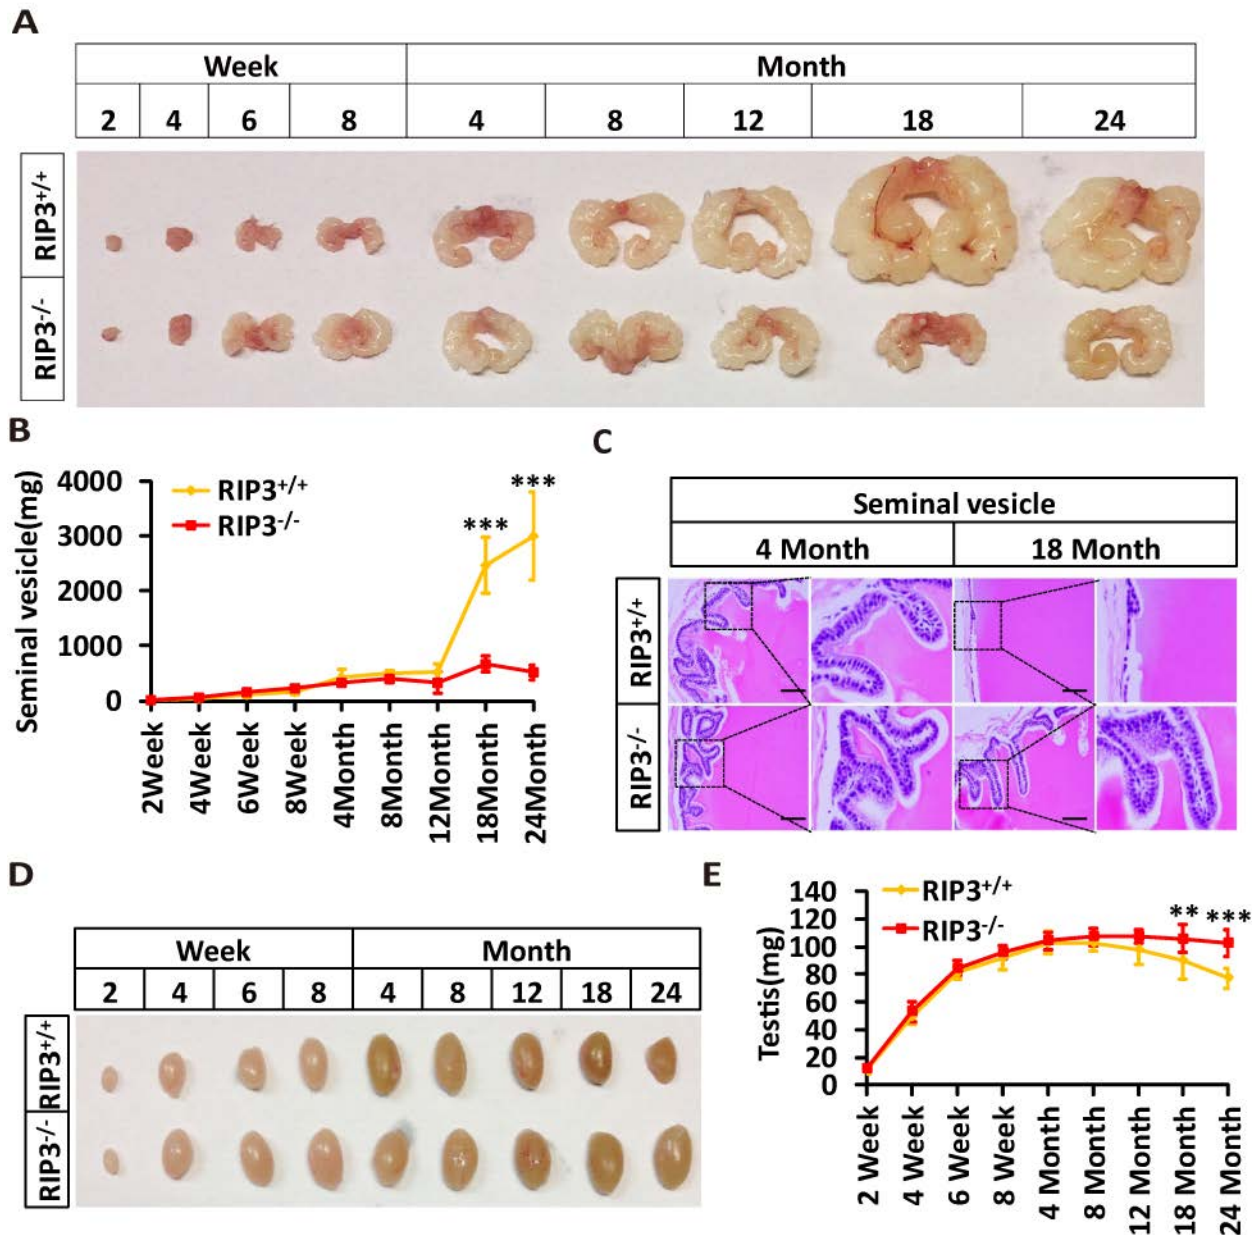

819

820 **Figure 1-figure supplement 1.** Morphological changes in seminal vesicles and testis during  
821 aging.

822 (A, B) Macroscopic features and weights of seminal vesicles at different time points. Mice were

823 sacrificed and the seminal vesicles from RIP3<sup>+/+</sup> and RIP3<sup>-/-</sup> mice at different ages were

824 photographed and weighed; each group is representative of at least twelve mice. Data represent  
825 the mean  $\pm$  S.D. \*\*\* $P < 0.001$ .  $P$  values were determined with unpaired Student's  $t$ -tests.

826 (C) H&E of seminal vesicles sections from RIP3<sup>+/+</sup> and RIP3<sup>-/-</sup> male mice. RIP3<sup>+/+</sup> and RIP3<sup>-/-</sup>  
827 mice were sacrificed and seminal vesicles were harvested and stained with H&E; each group is  
828 representative of six mice. Scale bar, 50 $\mu$ m.

829 (D, E) Macroscopic features and weights of testes at different ages. RIP3<sup>+/+</sup> and RIP3<sup>-/-</sup> mice of  
830 different ages were sacrificed and their testes were photographed and weighed; each group is  
831 representative of twelve mice. Data represent the mean  $\pm$  S.D. \*\* $P < 0.01$ , \*\*\* $P < 0.001$ .  $P$   
832 values were determined with unpaired Student's  $t$ -tests.

833

834

835

836

837

**Figure1-Figure Supplement 2**

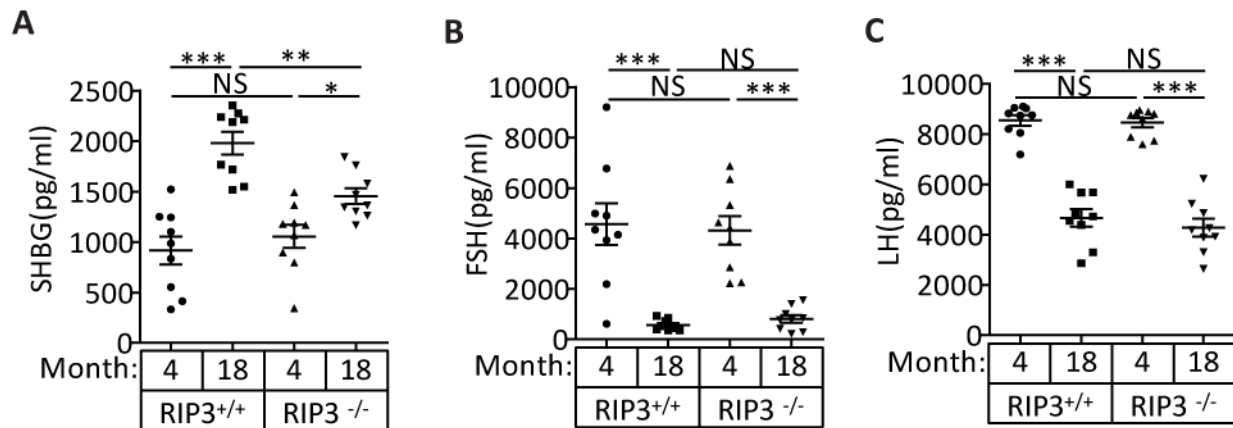

838

839 **Figure 1-figure supplement 2.** The levels of the pituitary endocrine hormones LH and FSH

840 decline normally in RIP3<sup>+/+</sup> and RIP3<sup>-/-</sup> mice.

841 (A) Serum SHBG levels of mice assayed using ELISA. Mice were sacrificed, and the levels of

842 sex hormone-binding globulin (SHBG) in serum from RIP3<sup>+/+</sup> (4 Month, n=10; 18 Month, n=10)

843 and RIP3<sup>-/-</sup> (4 Month, n=10; 18 Month, n=10) mice were measured using an SHBG ELISA kit.

844 (B) Serum FSH levels of mice assayed using ELISA. Mice were sacrificed, and the follicle-

845 stimulating hormone (FSH) levels in serum from RIP3<sup>+/+</sup> (4 Month, n=9; 18 Month, n=9) and

846 RIP3<sup>-/-</sup> (4 Month, n=9; 18 Month, n=9) mice were measured using a FSH ELISA kit.

847 (C) Serum LH levels of mice assayed using ELISA. Mice were sacrificed, and the luteinizing

848 hormone (LH) levels in serum from RIP3<sup>+/+</sup> (4 Month, n=9; 18 Month, n=9) and RIP3<sup>-/-</sup> (4

849 Month, n=9; 18 Month, n=9) mice was measured using an LH ELISA kit.

850 All graphs present the mean  $\pm$  s.e.m. \*\* $P < 0.01$ , \*\*\* $P < 0.001$ . P values were determined with

851 unpaired Student's *t*-tests. NS, not significant.

852

Figure1-Figure Supplement 3

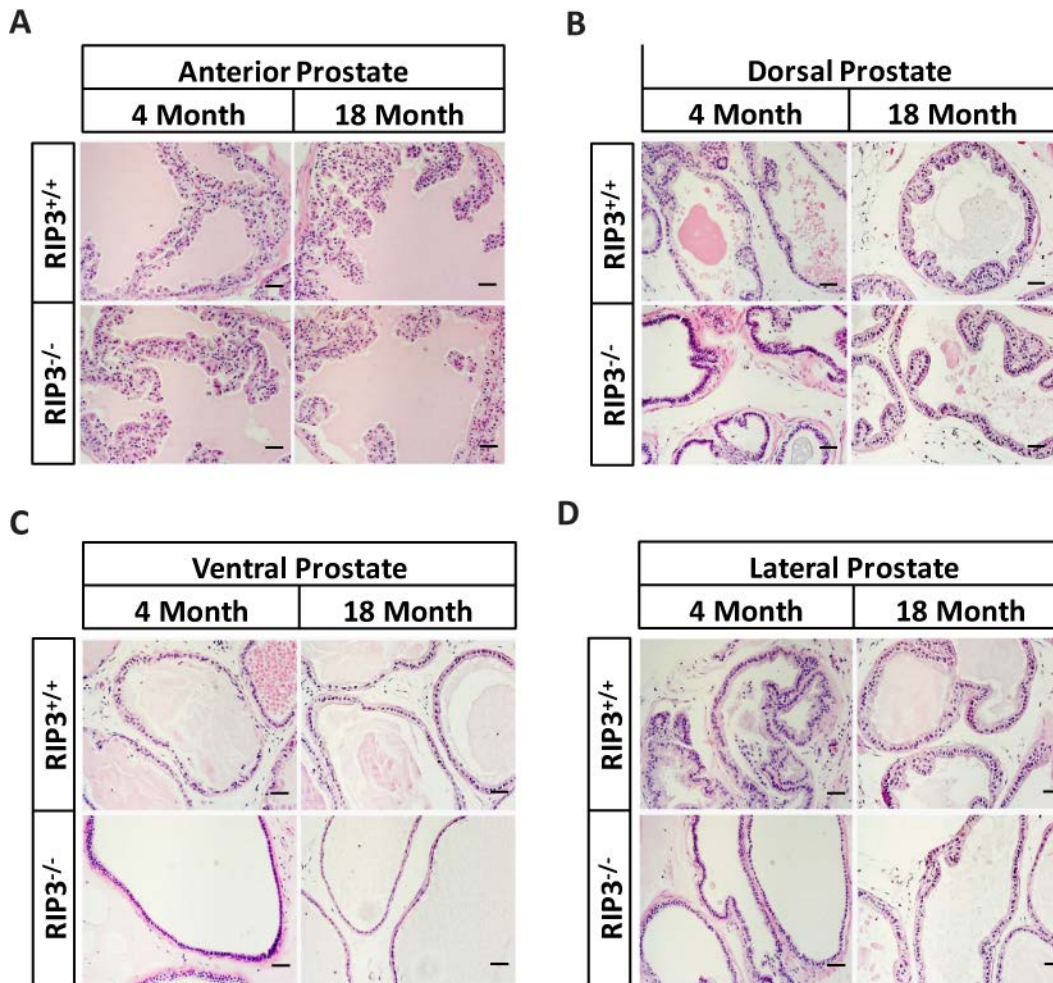

853

854

855 **Figure 1-figure supplement 3.** No morphological differences were apparent in the prostates of  
856 RIP3<sup>+/+</sup> and RIP3<sup>-/-</sup> mice.

857 **(A-D)** H&E of Anterior/Dorsal/Ventral/Lateral prostate sections from RIP3<sup>+/+</sup> and RIP3<sup>-/-</sup> mice.

858 Mice were sacrificed, prostates from RIP3<sup>+/+</sup> and RIP3<sup>-/-</sup> mice were harvested and stained with

859 H&E; each group is representative of six mice. Scale bar, 50µm.

860

## Figure1-Figure Supplement 4

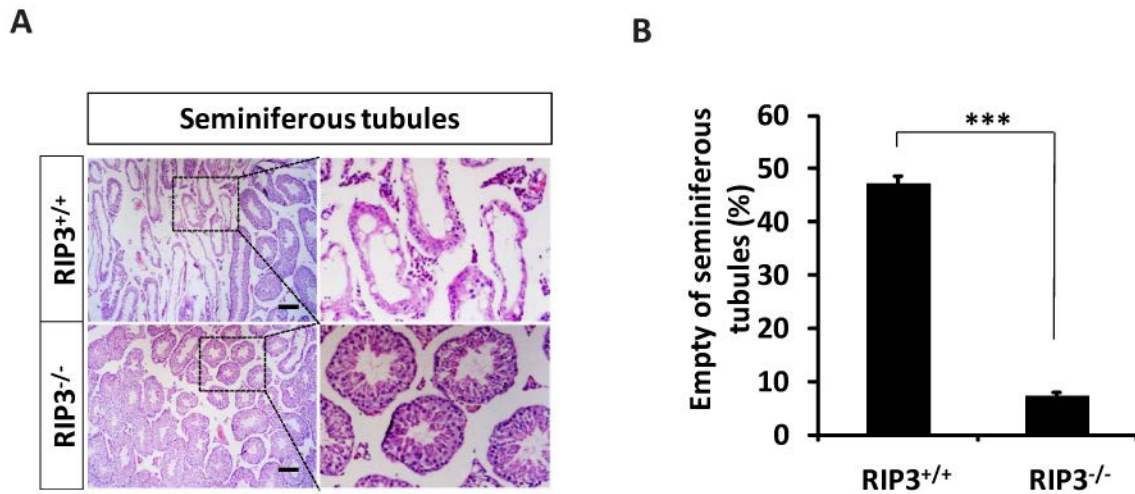

861

862 **Figure 1-figure supplement 4.** Morphological changes in seminiferous tubules in 36-month old  
863 mice.

864 (A, B) H&E of testis sections from RIP3<sup>+/+</sup> and RIP3<sup>-/-</sup> mice. Mice were sacrificed, testes from  
865 RIP3<sup>+/+</sup> (36 Months, n=6) and RIP3<sup>-/-</sup> (36 Months, n=6) mice were harvested and stained with  
866 H&E in (A). The number of empty seminiferous tubules was counted based on H&E staining and  
867 quantification in (B), empty seminiferous tubules were counted in 5 fields per testis. Scale bar,  
868 200 $\mu$ m. Data represent the mean  $\pm$  s.e.m. \*\*\* $P < 0.001$ .  $P$  values were determined with unpaired  
869 Student's  $t$ -tests.



Figure1-Figure Supplement 5

A

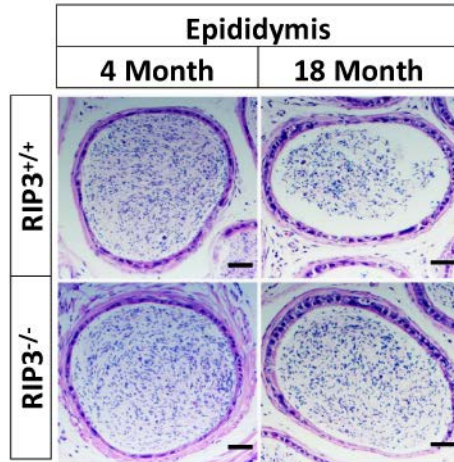

B

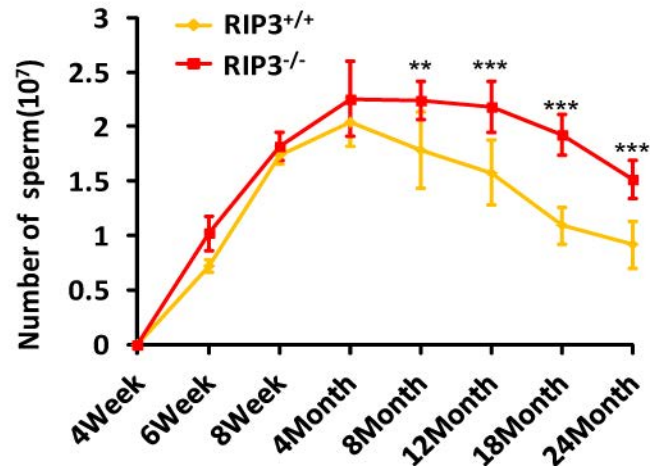

870

871

872 **Figure 1-figure supplement 5.**  $RIP3^{-/-}$  mice have higher sperm counts than  $RIP3^{+/+}$  mice at an  
873 advanced age.

874 (A) H&E of epididymis sections from  $RIP3^{+/+}$  and  $RIP3^{-/-}$  mice. Mice were sacrificed and  
875 epididymides from  $RIP3^{+/+}$  (4 Month, n=6; 18 Months, n=6) and  $RIP3^{-/-}$  (4 Month, n=6; 18  
876 Months, n=6) mice were harvested and stained with H&E. Scale bar, 50 $\mu$ m.

877 (B) Sperm count. Mice were sacrificed, and epididymides from  $RIP3^{+/+}$  and  $RIP3^{-/-}$  mice of at  
878 different ages were harvested. The number of sperm within the epididymis was counted using a  
879 cell counting chamber under a microscope; each group is representative of at least twelve mice.

880 Data represent the mean  $\pm$  S.D. \*\* $P < 0.01$ , \*\*\* $P < 0.001$ .  $P$  values were determined with  
881 unpaired Student's  $t$ -tests.

882

Figure1-Figure Supplement 6

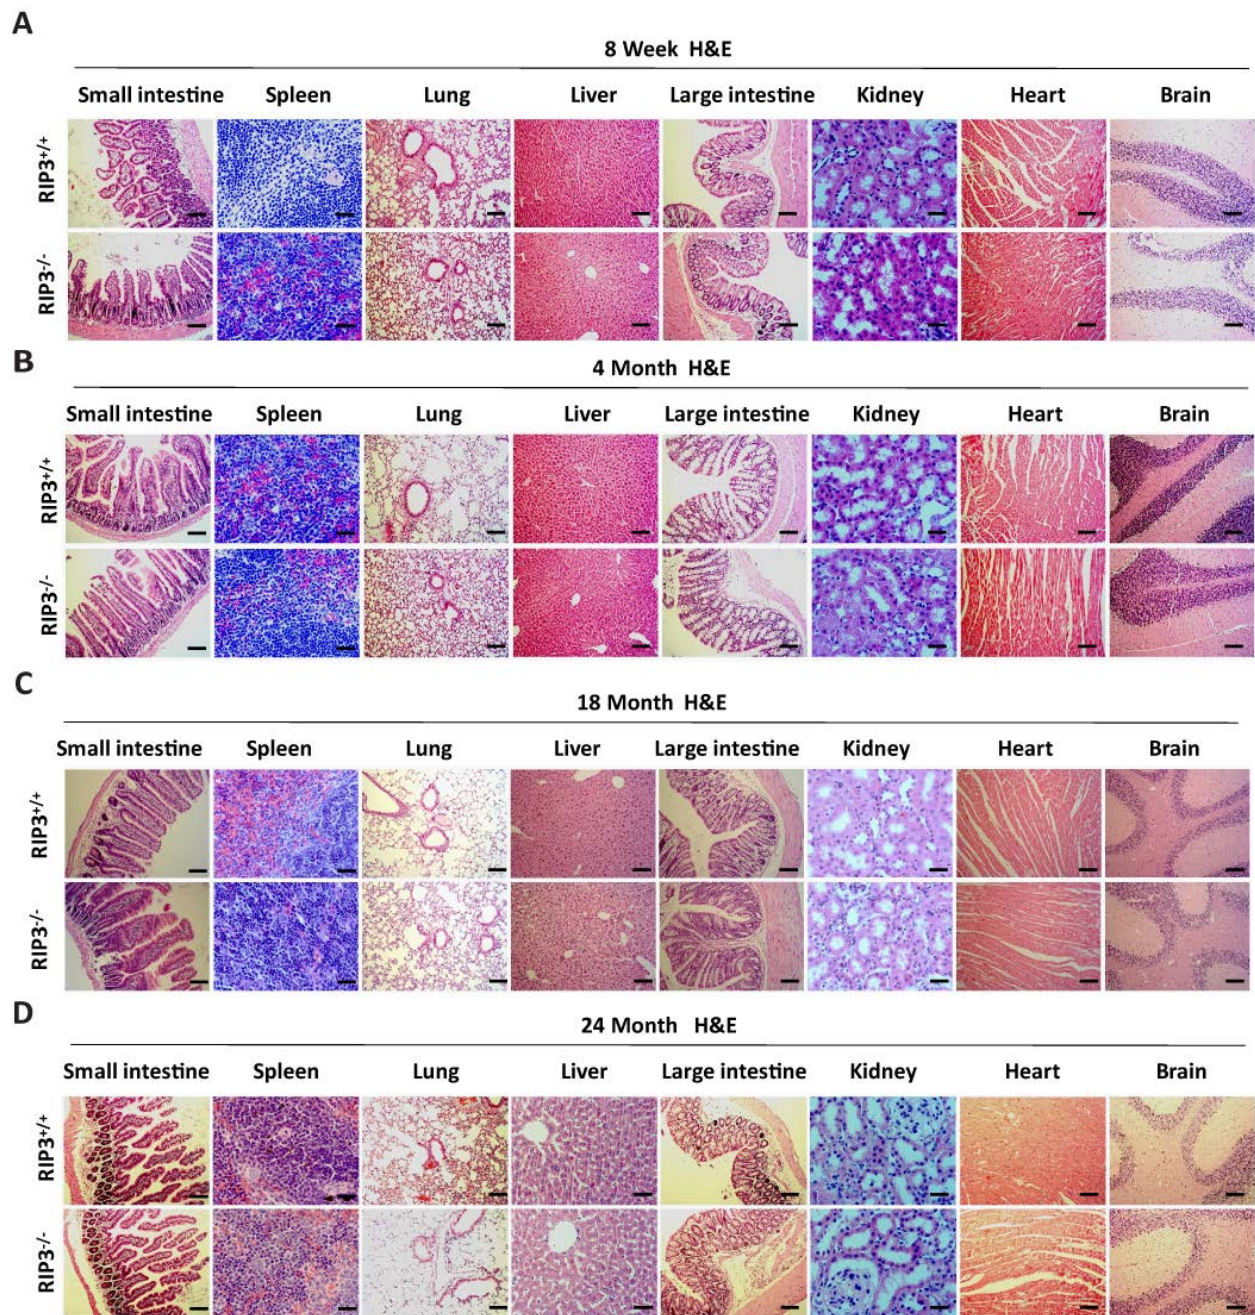

883

884

885 **Figure 1-figure supplement 6.** Histological analysis of various organs of RIP3<sup>+/+</sup> and RIP3<sup>-/-</sup>

886 mice.

887 (A-D) H&E of tissue sections from  $RIP3^{+/+}$  and  $RIP3^{-/-}$  male mice. Mice of different ages were  
888 sacrificed, the organs from  $RIP3^{+/+}$  and  $RIP3^{-/-}$  mice were harvested and stained with H&E; each  
889 group is representative of at least six mice. Scale bar, 100 $\mu$ m.

Figure1-Figure Supplement 7

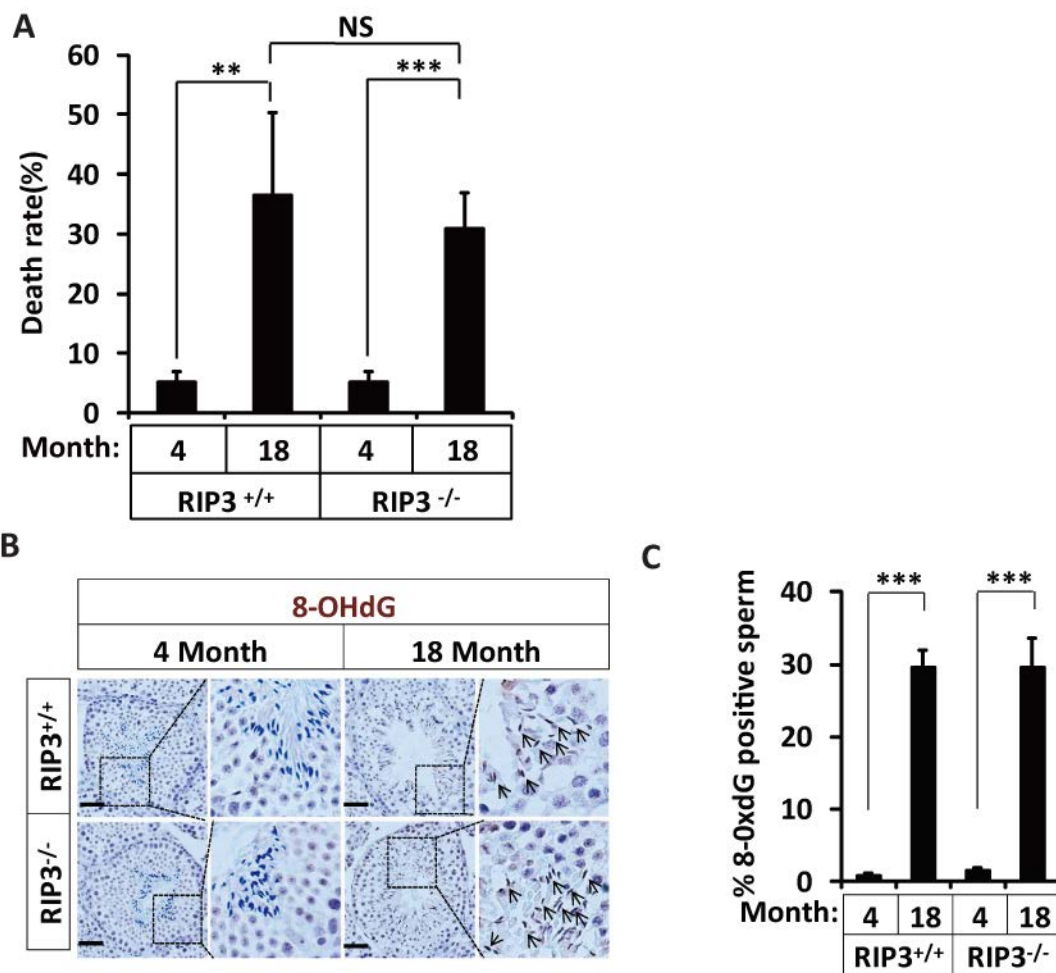

890  
891 **Figure 1-figure supplement 7.** Increase of rates of birth defects and oxidative damage in sperm  
892 from aged  $RIP3^{-/-}$  mice.

893 (A) Mortality of offspring from  $RIP3^{+/+}$  and  $RIP3^{-/-}$  male mice. One male mice of a given age  
894 was mated with a pairs of 10-week old female wild type mice for 3 months; females were  
895 replaced every 2 weeks. Litters were counted by date of birth of the pups; if a litter was born but

896 did not survive, we counted the dead pups; if we were not able to count the pups, the number of  
897 pups was entered as '0'. Mortality of offspring from 4-month old RIP3<sup>+/+</sup> (n=5) and RIP3<sup>-/-</sup> (n=5)  
898 male mice; offspring from 18-month old RIP3<sup>+/+</sup> (n=4) and RIP3<sup>-/-</sup> (n=15) male mice were  
899 calculated. Data represent the mean  $\pm$  S.D. \*\* $P < 0.01$ , \*\*\* $P < 0.001$ .  $P$  values were determined  
900 with unpaired Student's  $t$ -tests. NS, not significant.

901 **(B, C)** IHC of RIP3<sup>+/+</sup> and RIP3<sup>-/-</sup> testes with 8-OHdG antibody. Mice were sacrificed, testes  
902 from RIP3<sup>+/+</sup> (4 Months, n=6; 18 Months, n=6) and RIP3<sup>-/-</sup> (4 Months, n=6; 18 Months, n=6)  
903 mice were harvested and stained with 8-OHdG antibody in (B) (black arrows for sperm with 8-  
904 OHdG staining). 8-OHdG<sup>+</sup> sperm were counted in 5 fields per testis and quantification in (C).  
905 Scale bar, 100 $\mu$ m. Data represent the mean  $\pm$  S.D. \*\*\* $P < 0.001$ .  $P$  values were determined with  
906 unpaired Student's  $t$ -tests.

907

908

909

910

911

912

913

914

915

916

917

918

## Figure2-Figure Supplement 1

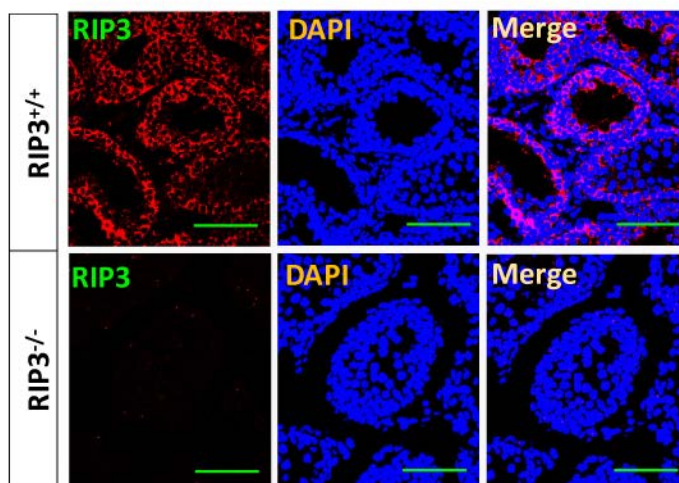

919

920

921 **Figure 2-figure supplement 1.** RIP3 expression in seminiferous tubules.

922 Immunofluorescence of testes from RIP3<sup>+/+</sup> and RIP3<sup>-/-</sup> mice (2 weeks) with RIP3 antibody.

923 Counterstaining with DAPI, blue. Scale bar, 100 $\mu$ m.

### Figure3-Figure Supplement 1

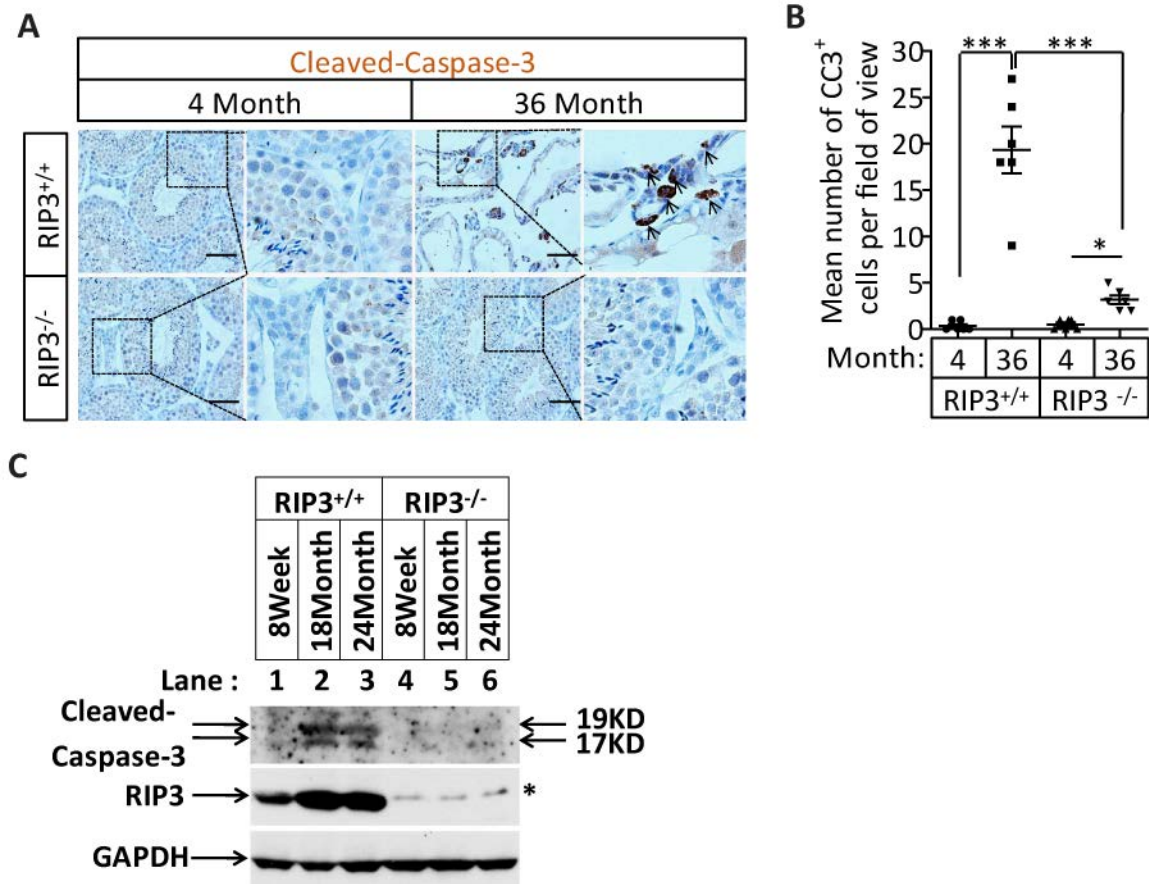

924

925

926 **Figure 3-figure supplement 1.** Activation of apoptosis in Leydig cells during aging.

927 (A, B) IHC of testis from RIP3<sup>+/+</sup> and RIP3<sup>-/-</sup> mice with Cleaved-Caspase-3 antibody. Mice were

928 sacrificed, testes from RIP3<sup>+/+</sup> (4 Month, n=6; 36 Months, n=6) and RIP3<sup>-/-</sup> (4 Month, n=6; 36

929 Months, n=6) mice were harvested and stained with Cleaved-Caspase-3 antibody in (A) (black

930 arrows for Leydig cells with Cleaved-Caspase-3 staining). Cleaved-Caspase-3<sup>+</sup> cells were

931 counted in 6 fields per testis and quantification in (B). Scale bar, 100µm. Data represent the

932 mean ± s.e.m. \**P*<0.05, \*\*\**P*<0.001. *P* values were determined with unpaired Student's *t*-

933 tests.

934 (C) Western blot analysis of RIP3 and Cleaved-Caspase-3 levels in the testis after perfusion;  
935 each group is representative of at least three mice. GAPDH was used as a loading control.  
936

Figure3-Figure Supplement 2

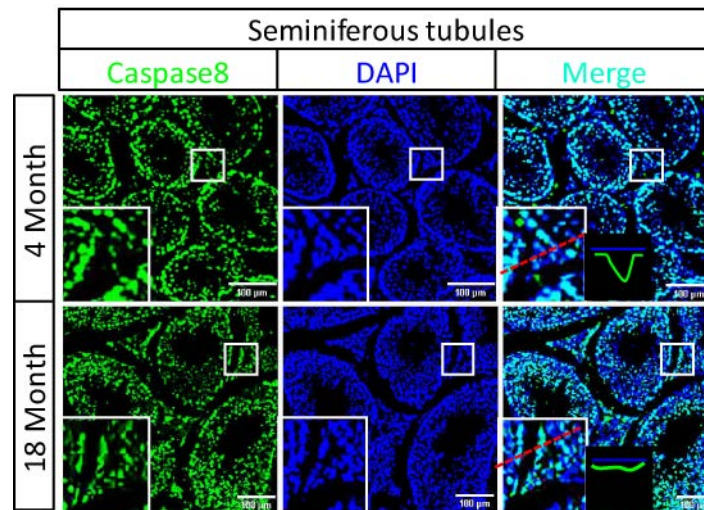

937

938

939 **Figure 3-figure supplement 2.** Caspase8 levels increase during aging in Leydig cells.

940 Immunofluorescence of testes from 4-Month old and 18-month old wild type mice with caspase8

941 antibody. Counterstaining with DAPI, blue. Scale bar, 100μm.

### Figure5-Figure Supplement 1

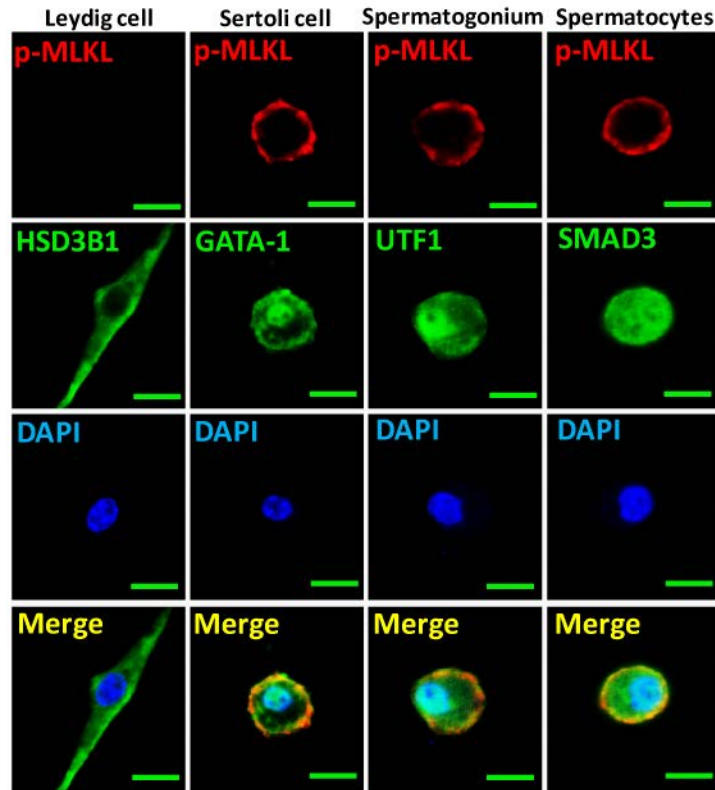

942

943 **Figure 5-figure supplement 1.** Activation of necroptosis in germ line stem cells and Sertoli  
944 cells in seminiferous tubules.

945 Primary testis cells were isolated from wild type testes, immunofluorescence of Leydig cells,  
946 Sertoli cells, spermatogonia, and primary spermatocytes with antibodies against p-MLKL (red),  
947 HSD3B1 (green), GATA-1 (green), UTF1 (green), and SMAD3 (green) after stimulation with  
948 TSZ for 10 hours. Counterstaining with DAPI, blue. Scale bar, 10 $\mu$ m.

949

950

951



**Figure1-Table supplement 1.** Summary of the total fertility rates and mortality rates of the offspring of 4- or 18-month old RIP3<sup>+/+</sup> and RIP3<sup>-/-</sup> male mice.

| RIP3 <sup>+/+</sup> (male,4 Month)                          |                                |      |               |            | RIP3 <sup>-/-</sup> (male,4Month)                          |                                |      |               |            |
|-------------------------------------------------------------|--------------------------------|------|---------------|------------|------------------------------------------------------------|--------------------------------|------|---------------|------------|
| Mice no.                                                    | pregnancies times(n) (females) | pups | pups death(n) | Death rate | Mice no.                                                   | pregnancies times(n) (females) | pups | pups death(n) | Death rate |
| #1                                                          | 4                              | 26   | 1             | 3.85       | #1                                                         | 4                              | 30   | 2             | 6.67       |
| #2                                                          | 6                              | 40   | 2             | 5.00       | #2                                                         | 4                              | 27   | 1             | 3.70       |
| #3                                                          | 4                              | 28   | 1             | 3.57       | #3                                                         | 6                              | 47   | 3             | 6.38       |
| #4                                                          | 4                              | 27   | 2             | 7.41       | #4                                                         | 6                              | 37   | 2             | 5.41       |
| #5                                                          | 5                              | 31   | 2             | 6.45       | #5                                                         | 5                              | 34   | 2             | 5.88       |
| <b>Male fertility rate:100%;Death rate:(5.26±1.65) %</b>    |                                |      |               |            | <b>Male fertility rate:100%;Death rate:(5.26±1.66)%</b>    |                                |      |               |            |
| RIP3 <sup>+/+</sup> (male,18 Month)                         |                                |      |               |            | RIP3 <sup>-/-</sup> (male,18Month)                         |                                |      |               |            |
| Mice no.                                                    | pregnancies times(n) (females) | pups | pups death(n) | Death rate | Mice no.                                                   | pregnancies times(n) (females) | pups | pups death(n) | Death rate |
| #1                                                          | 2                              | 14   | 8             | 57.14      | #1                                                         | 2                              | 18   | 7             | 38.89      |
| #2                                                          | 0                              | 0    | 0             | 0          | #2                                                         | 4                              | 34   | 10            | 29.41      |
| #3                                                          | 0                              | 0    | 0             | 0          | #3                                                         | 0                              | 0    | 0             | 0          |
| #4                                                          | 2                              | 17   | 5             | 29.41      | #4                                                         | 7                              | 61   | 19            | 31.15      |
| #5                                                          | 0                              | 0    | 0             | 0          | #5                                                         | 3                              | 25   | 8             | 32.00      |
| #6                                                          | 0                              | 0    | 0             | 0          | #6                                                         | 4                              | 33   | 10            | 30.30      |
| #7                                                          | 0                              | 0    | 0             | 0          | #7                                                         | 0                              | 0    | 0             | 0          |
| #8                                                          | 3                              | 24   | 7             | 29.17      | #8                                                         | 0                              | 0    | 0             | 0          |
| #9                                                          | 0                              | 0    | 0             | 0          | #9                                                         | 0                              | 0    | 0             | 0          |
| #10                                                         | 0                              | 0    | 0             | 0          | #10                                                        | 3                              | 24   | 7             | 29.17      |
| #11                                                         | 0                              | 0    | 0             | 0          | #11                                                        | 0                              | 0    | 0             | 0          |
| #12                                                         | 0                              | 0    | 0             | 0          | #12                                                        | 2                              | 19   | 5             | 26.32      |
| #13                                                         | 0                              | 0    | 0             | 0          | #13                                                        | 0                              | 0    | 0             | 0          |
| #14                                                         | 0                              | 0    | 0             | 0          | #14                                                        | 2                              | 16   | 4             | 25.00      |
| #15                                                         | 0                              | 0    | 0             | 0          | #15                                                        | 0                              | 0    | 0             | 0          |
| #16                                                         | 0                              | 0    | 0             | 0          | #16                                                        | 2                              | 15   | 6             | 40.00      |
| #17                                                         | 3                              | 20   | 6             | 30.00      | #17                                                        | 3                              | 28   | 5             | 17.86      |
| #18                                                         | 0                              | 0    | 0             | 0          | #18                                                        | 2                              | 12   | 3             | 25.00      |
| #19                                                         | 0                              | 0    | 0             | 0          | #19                                                        | 3                              | 30   | 12            | 40.00      |
| #20                                                         | 0                              | 0    | 0             | 0          | #20                                                        | 2                              | 19   | 6             | 31.58      |
| #21                                                         | 0                              | 0    | 0             | 0          | #21                                                        | 3                              | 23   | 7             | 30.43      |
| #22                                                         | 0                              | 0    | 0             | 0          | #22                                                        | 3                              | 26   | 9             | 34.62      |
| <b>Male fertility rate:18.18%;Death rate:(36.43±13.81)%</b> |                                |      |               |            | <b>Male fertility rate:68.18%;Death rate:(30.78±6.04)%</b> |                                |      |               |            |

952

953 **Figure 1-table supplement 1.** Summary of the fertility rates and mortality rates of the offspring

954 of 4- or 18-month old RIP3<sup>+/+</sup> and RIP3<sup>-/-</sup> male mice.

**Figure1-Table supplement 2.** Summary of the total fertility rates and mortality rates of the offspring of 13-month old RIP3<sup>+/+</sup> and RIP3<sup>-/-</sup> male mice.

| RIP3 <sup>+/+</sup> (male,13 Month) |                                |      | RIP3 <sup>-/-</sup> (male,13Month) |                                |      |
|-------------------------------------|--------------------------------|------|------------------------------------|--------------------------------|------|
| Mice no.                            | pregnancies times(n) (females) | pups | Mice no.                           | pregnancies times(n) (females) | pups |
| #1                                  | 0                              | 0    | #1                                 | 5                              | 34   |
| #2                                  | 5                              | 53   | #2                                 | 8                              | 56   |
| #3                                  | 6                              | 44   | #3                                 | 5                              | 48   |
| #4                                  | 8                              | 55   | #4                                 | 7                              | 56   |
| #5                                  | 0                              | 0    | #5                                 | 9                              | 66   |
| #6                                  | 6                              | 24   | #6                                 | 0                              | 0    |
| #7                                  | 7                              | 49   | #7                                 | 14                             | 90   |
| #8                                  | 5                              | 31   | #8                                 | 8                              | 58   |
| #9                                  | 6                              | 37   | #9                                 | 6                              | 31   |
| #10                                 | 0                              | 0    | #10                                | 10                             | 66   |
| #11                                 | 5                              | 33   | #11                                | 8                              | 54   |
| #12                                 | 0                              | 0    | #12                                | 4                              | 14   |
| #13                                 | 0                              | 0    | #13                                | 2                              | 18   |
| #14                                 | 0                              | 0    | #14                                | 9                              | 70   |
| #15                                 | 0                              | 0    | #15                                | 7                              | 40   |
| #16                                 | 0                              | 0    | #16                                | 0                              | 0    |
| #17                                 | 0                              | 0    | #17                                | 0                              | 0    |
| #18                                 | 0                              | 0    | #18                                | 0                              | 0    |
| #19                                 | 0                              | 0    | #19                                | 0                              | 0    |
| #20                                 | 5                              | 29   | #20                                | 4                              | 27   |
|                                     |                                |      | #21                                | 9                              | 57   |
|                                     |                                |      | #22                                | 8                              | 59   |
|                                     |                                |      | #23                                | 7                              | 50   |
| <b>Male fertility rate:45.00%</b>   |                                |      | <b>Male fertility rate:78.26%</b>  |                                |      |

955

956 **Figure 1-table supplement 2.** Summary of the fertility rates and mortality rates of the offspring

957 of 13-month old RIP3<sup>+/+</sup> and RIP3<sup>-/-</sup> male mice.

958
